# Supplementary material for: Skeletal muscle metabolomics and blood biochemistry analysis reveal metabolic changes associated with dietary amino acid supplementation in dairy calves
Source: PubMed Central journal article supplement (PMC6138728; doi:10.1038/s41598-018-32241-4), 2018-09-14
Supplement: 41598_2018_32241_MOESM1_ESM.pdf [file 41598_2018_32241_MOESM1_ESM.pdf]

## Supplementary Material

### Skeletal muscle metabolomics and blood biochemistry analysis reveal metabolic changes associated with dietary amino acid supplementation in dairy calves

Kuai Yu <sup>1</sup>, Manolis Matzapetakis <sup>3</sup>, Daniel Valent <sup>2</sup>, Yolanda Saco <sup>1,2</sup>,  
Andre M. Almeida <sup>4</sup>, Marta Terré <sup>5</sup> and Anna Bassols <sup>1,2</sup>

**Supplementary Figure S1:** a: Binned muscle extract NMR spectra between 1.422 - 1.467 and 1.632 - 1.760 ppm; **b** and **c**: Total area quantification between 1.422 - 1.467 and 1.632 -1.760 ppm, respectively. Page 2

**Supplementary Table S 1:** List of 70 identified metabolites in muscle tissue. Page 3

**Supplementary Table S2:** VIP score>2.5 with metabolite assignments of chemometrics PLS-DA in Ctrl - FY comparison. Page 4

**Supplementary Table S3** Tukey HSD of ANOVA for quantified blood analytes from calves supplemented with different amino acids. Page 10

**Supplementary Table S4** Tukey HSD of ANOVA for quantified muscle metabolites from calves supplemented with different amino acids. Page 18

**a**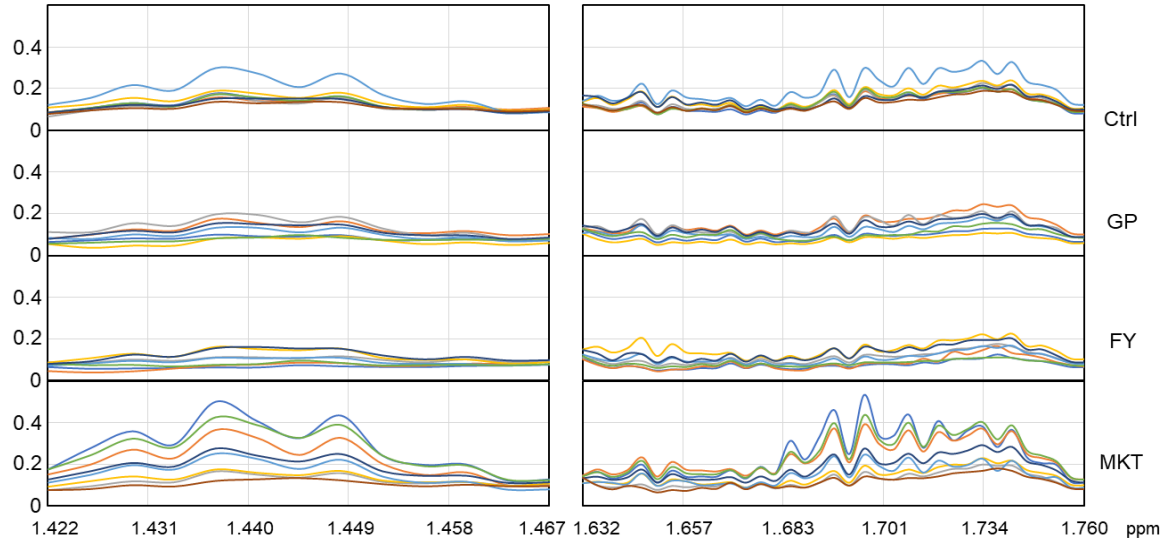**b**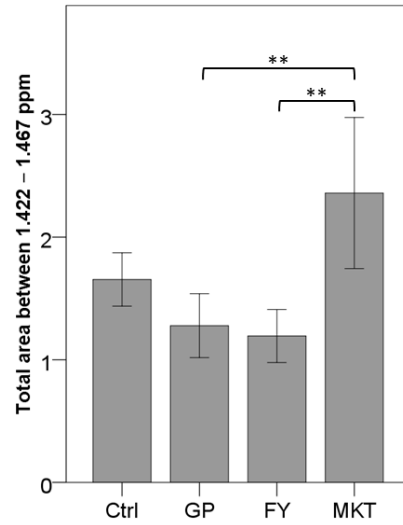**c**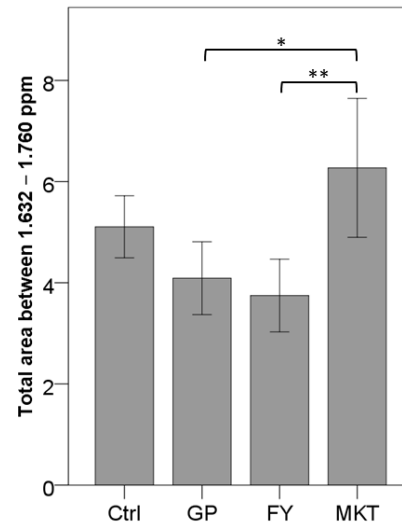

**Supplementary Table S1:** List 70 Identified muscle tissue metabolites. Key: Quantified metabolites are shown in bold.

|                            |                         |                           |                     |
|----------------------------|-------------------------|---------------------------|---------------------|
| <b>3-Hydroxybutyrate</b>   | <b>Acetate</b>          | Acetoacetate              | Adenine             |
| <b>ADP</b>                 | <b>Alanine</b>          | <b>AMP</b>                | <b>Anserine</b>     |
| Arginine                   | Asparagine              | <b>Aspartate</b>          | <b>ATP</b>          |
| <b>Betaine</b>             | <b>Cadaverine</b>       | <b>Carnitine</b>          | <b>Carnosine</b>    |
| Citrate                    | <b>Creatine</b>         | <b>Creatine phosphate</b> | <b>Creatinine</b>   |
| Cysteine                   | Cystine                 | D-Lactic acid             | Ethanol             |
| Formate                    | <b>Fumarate</b>         | <b>Glucose</b>            | Glucose-1-phosphate |
| <b>Glucose-6-phosphate</b> | <b>Glutamate</b>        | Glutamine                 | Glutathione         |
| Glycerol 3-phosphate       | <b>Glycine</b>          | GTP                       | Histamine           |
| Histidine                  | Homocysteine            | IMP                       | Inosine             |
| <b>Isoleucine</b>          | <b>Lactate</b>          | <b>Leucine</b>            | Lysine              |
| Malonic acid               | <b>Mannose</b>          | Methanol                  | Methionine          |
| <b>Myo-Inositol</b>        | <b>NAD+</b>             | <b>NADH</b>               | <b>NADP</b>         |
| NADPH                      | <b>Nicotinurate</b>     | <b>O-Acetylcarnitine</b>  | O-Phosphocholine    |
| Ornithine                  | <b>Phenylalanine</b>    | Proline                   | <b>Pyruvate</b>     |
| Serine                     | <b>Taurine</b>          | Threonine                 | <b>Tryptophan</b>   |
| <b>Tyrosine</b>            | UMP                     | Uridine                   | <b>Valine</b>       |
| $\pi$ -Methylhistidine     | $\tau$ -Methylhistidine |                           |                     |

**Table S2** Variable importance in projection (VIP) score>2.5 with metabolite assignments of chemometrics PLS discriminant analysis in Ctrl - FY comparison.

| Chemical shi | VIP  | Compound             |
|--------------|------|----------------------|
| 1.418        | 2.66 | Cadaverine/Lysine    |
| 1.418        | 2.69 | Cadaverine/Lysine    |
| 1.418        | 2.71 | Cadaverine/Lysine    |
| 1.419        | 2.72 | Cadaverine/Lysine    |
| 1.419        | 2.72 | Cadaverine/Lysine    |
| 1.419        | 2.70 | Cadaverine/Lysine    |
| 1.419        | 2.69 | Cadaverine/Lysine    |
| 1.420        | 2.68 | Cadaverine/Lysine    |
| 1.420        | 2.67 | Cadaverine/Lysine    |
| 1.420        | 2.67 | Cadaverine/Lysine    |
| 1.421        | 2.66 | Cadaverine/Lysine    |
| 1.421        | 2.64 | Cadaverine/Lysine    |
| 1.421        | 2.61 | Cadaverine/Lysine    |
| 1.422        | 2.60 | Cadaverine/Lysine    |
| 1.422        | 2.59 | Cadaverine/Lysine    |
| 1.422        | 2.58 | Cadaverine/Lysine    |
| 1.423        | 2.57 | Cadaverine/Lysine    |
| 1.423        | 2.55 | Cadaverine/Lysine    |
| 1.423        | 2.51 | Cadaverine/Lysine    |
| 1.429        | 2.52 | Cadaverine/Lysine    |
| 1.430        | 2.57 | Cadaverine/Lysine    |
| 1.430        | 2.59 | Cadaverine/Lysine    |
| 1.430        | 2.59 | Cadaverine/Lysine    |
| 1.431        | 2.58 | Cadaverine/Lysine    |
| 1.431        | 2.55 | Cadaverine/Lysine    |
| 1.431        | 2.50 | Cadaverine/Lysine    |
| 1.664        | 2.70 | Leucine/Unassigned 7 |
| 1.664        | 2.77 | Leucine/Unassigned 7 |
| 1.664        | 2.83 | Leucine/Unassigned 7 |
| 1.665        | 2.87 | Leucine/Unassigned 7 |
| 1.665        | 2.88 | Leucine/Unassigned 7 |
| 1.665        | 2.87 | Leucine/Unassigned 7 |
| 1.666        | 2.85 | Leucine/Unassigned 7 |
| 1.666        | 2.81 | Leucine/Unassigned 7 |
| 1.666        | 2.77 | Leucine/Unassigned 7 |
| 1.667        | 2.71 | Leucine/Unassigned 7 |
| 1.667        | 2.71 | Leucine/Unassigned 7 |
| 1.667        | 2.60 | Leucine/Unassigned 7 |
| 1.668        | 2.52 | Leucine/Unassigned 7 |
| 1.670        | 2.60 | Leucine/Unassigned 7 |
| 1.671        | 2.73 | Leucine/Unassigned 7 |
| 1.671        | 2.52 | Leucine/Unassigned 7 |
| 1.672        | 2.59 | Leucine/Unassigned 7 |
| 1.672        | 2.66 | Leucine/Unassigned 7 |
| 1.672        | 2.72 | Leucine/Unassigned 7 |

|       |      |                           |
|-------|------|---------------------------|
| 1.673 | 2.78 | Leucine/Unassigned 7      |
| 1.673 | 2.63 | Leucine/Unassigned 7      |
| 1.673 | 2.66 | Leucine/Unassigned 7      |
| 1.674 | 2.69 | Leucine/Unassigned 7      |
| 1.674 | 2.71 | Leucine/Unassigned 7      |
| 1.674 | 2.72 | Leucine/Unassigned 7      |
| 1.674 | 2.71 | Leucine/Unassigned 7      |
| 1.675 | 2.70 | Leucine/Unassigned 7      |
| 1.675 | 2.72 | Leucine/Unassigned 7      |
| 1.675 | 2.78 | Leucine/Unassigned 7      |
| 1.676 | 2.87 | Leucine/Unassigned 7      |
| 1.676 | 2.95 | Leucine/Unassigned 7      |
| 1.676 | 3.01 | Leucine/Unassigned 7      |
| 1.677 | 3.01 | Leucine/Unassigned 7      |
| 1.677 | 2.95 | Leucine/Unassigned 7      |
| 1.677 | 2.89 | Leucine/Unassigned 7      |
| 1.678 | 2.77 | Leucine/Unassigned 7      |
| 1.678 | 2.68 | Leucine/Unassigned 7      |
| 1.678 | 2.60 | Leucine/Unassigned 7      |
| 1.679 | 2.57 | Leucine/Unassigned 7      |
| 1.679 | 2.57 | Leucine/Unassigned 7      |
| 1.679 | 2.61 | Leucine/Unassigned 7      |
| 1.679 | 2.67 | Leucine/Unassigned 7      |
| 1.680 | 2.75 | Leucine/Unassigned 7      |
| 1.680 | 2.83 | Leucine/Unassigned 7      |
| 1.680 | 2.90 | Leucine/Unassigned 7      |
| 1.681 | 2.92 | Leucine/Unassigned 7      |
| 1.681 | 2.91 | Leucine/Unassigned 7      |
| 1.681 | 2.87 | Leucine/Unassigned 7      |
| 1.682 | 2.82 | Leucine/Unassigned 7      |
| 1.682 | 2.78 | Leucine/Unassigned 7      |
| 1.682 | 2.74 | Leucine/Unassigned 7      |
| 1.683 | 2.72 | Leucine/Unassigned 7      |
| 1.683 | 2.72 | Leucine/Unassigned 7      |
| 1.683 | 2.93 | Leucine/Unassigned 7      |
| 1.684 | 2.99 | Leucine/Unassigned 7      |
| 1.684 | 3.06 | Leucine/Unassigned 7      |
| 1.684 | 3.11 | Leucine/Unassigned 7      |
| 1.684 | 3.14 | Leucine/Unassigned 7      |
| 1.685 | 3.15 | Leucine/Unassigned 7      |
| 1.685 | 3.12 | Leucine/Unassigned 7      |
| 1.685 | 3.06 | Leucine/Unassigned 7      |
| 1.686 | 2.98 | Leucine/Unassigned 7      |
| 1.686 | 2.89 | Leucine/Unassigned 7      |
| 1.686 | 2.80 | Leucine/Unassigned 7      |
| 1.687 | 2.70 | Leucine/Unassigned 7      |
| 1.687 | 2.59 | Leucine/Unassigned 7      |
| 1.690 | 2.50 | Cadaverine/Lysine/Leucine |
| 1.690 | 2.54 | Cadaverine/Lysine/Leucine |

|       |      |                                                                                                                     |
|-------|------|---------------------------------------------------------------------------------------------------------------------|
| 1.691 | 2.61 | Cadaverine/Lysine/Leucine                                                                                           |
| 1.691 | 2.67 | Cadaverine/Lysine/Leucine                                                                                           |
| 1.691 | 2.71 | Cadaverine/Lysine/Leucine                                                                                           |
| 1.692 | 2.73 | Cadaverine/Lysine/Leucine                                                                                           |
| 1.692 | 2.72 | Cadaverine/Lysine/Leucine                                                                                           |
| 1.692 | 2.68 | Cadaverine/Lysine/Leucine                                                                                           |
| 1.693 | 2.63 | Cadaverine/Lysine/Leucine                                                                                           |
| 1.693 | 2.57 | Cadaverine/Lysine/Leucine                                                                                           |
| 1.693 | 2.51 | Cadaverine/Lysine/Leucine                                                                                           |
| 1.705 | 2.54 | Cadaverine/Lysine/Arginine/Leucine                                                                                  |
| 1.705 | 2.58 | Cadaverine/Lysine/Arginine/Leucine                                                                                  |
| 1.705 | 2.59 | Cadaverine/Lysine/Arginine/Leucine                                                                                  |
| 1.706 | 2.60 | Cadaverine/Lysine/Arginine/Leucine                                                                                  |
| 1.706 | 2.59 | Cadaverine/Lysine/Arginine/Leucine                                                                                  |
| 1.706 | 2.59 | Cadaverine/Lysine/Arginine/Leucine                                                                                  |
| 1.707 | 2.58 | Cadaverine/Lysine/Arginine/Leucine                                                                                  |
| 1.707 | 2.55 | Cadaverine/Lysine/Arginine/Leucine                                                                                  |
| 1.715 | 2.52 | Cadaverine/Lysine/Arginine/Leucine                                                                                  |
| 1.716 | 2.54 | Cadaverine/Lysine/Arginine/Leucine                                                                                  |
| 1.716 | 2.53 | Cadaverine/Lysine/Arginine/Leucine                                                                                  |
| 3.764 | 2.52 | Lysine/Alanine/Mannose/Glutamine/Arginine/Glutathione/Ornithine/Glucose/Glucose-1-phosphate/ $\pi$ -Methylhistidine |
| 3.764 | 2.83 | Lysine/Alanine/Mannose/Glutamine/Arginine/Glutathione/Ornithine/Glucose/Glucose-1-phosphate/ $\pi$ -Methylhistidine |
| 3.765 | 3.02 | Lysine/Alanine/Mannose/Glutamine/Arginine/Glutathione/Ornithine/Glucose/Glucose-1-phosphate/ $\pi$ -Methylhistidine |
| 3.765 | 3.02 | Lysine/Alanine/Mannose/Glutamine/Arginine/Glutathione/Ornithine/Glucose/Glucose-1-phosphate/ $\pi$ -Methylhistidine |
| 3.765 | 2.53 | Lysine/Alanine/Mannose/Glutamine/Arginine/Glutathione/Ornithine/Glucose/Glucose-1-phosphate/ $\pi$ -Methylhistidine |
| 4.683 | 2.56 | NADH                                                                                                                |
| 4.683 | 2.59 | NADH                                                                                                                |
| 4.684 | 2.52 | NADH                                                                                                                |
| 5.451 | 2.51 | Glucose-1-phosphate                                                                                                 |
| 5.452 | 2.74 | Glucose-1-phosphate                                                                                                 |
| 5.452 | 2.82 | Glucose-1-phosphate                                                                                                 |
| 5.452 | 2.77 | Glucose-1-phosphate                                                                                                 |
| 5.453 | 2.59 | Glucose-1-phosphate                                                                                                 |
| 5.456 | 2.60 | Glucose-1-phosphate                                                                                                 |
| 5.457 | 2.67 | Glucose-1-phosphate                                                                                                 |
| 5.457 | 2.60 | Glucose-1-phosphate                                                                                                 |
| 5.715 | 2.57 | Unassigned 4                                                                                                        |
| 5.715 | 2.59 | Unassigned 4                                                                                                        |
| 5.912 | 2.54 | Uridine                                                                                                             |
| 5.913 | 2.67 | Uridine                                                                                                             |
| 5.913 | 2.71 | Uridine                                                                                                             |
| 5.913 | 2.80 | Uridine                                                                                                             |
| 5.914 | 2.91 | Uridine                                                                                                             |

|       |      |                |
|-------|------|----------------|
| 5.914 | 2.76 | Uridine        |
| 5.914 | 2.55 | Uridine        |
| 5.916 | 2.50 | Uridine        |
| 5.917 | 2.63 | Uridine        |
| 5.917 | 2.84 | Uridine        |
| 5.917 | 2.88 | Uridine        |
| 5.917 | 2.79 | Uridine        |
| 5.918 | 2.75 | Uridine        |
| 5.918 | 2.70 | Uridine        |
| 5.918 | 2.60 | Uridine        |
| 5.936 | 2.58 | GTP            |
| 5.936 | 2.69 | GTP            |
| 5.936 | 2.76 | GTP            |
| 5.937 | 2.80 | GTP            |
| 5.937 | 2.77 | GTP            |
| 5.937 | 2.72 | GTP            |
| 5.937 | 2.66 | GTP            |
| 5.938 | 2.59 | GTP            |
| 5.938 | 2.53 | GTP            |
| 5.942 | 2.57 | GTP            |
| 5.942 | 2.76 | GTP            |
| 5.942 | 2.91 | GTP            |
| 5.943 | 3.05 | GTP            |
| 5.943 | 3.15 | GTP            |
| 5.943 | 3.16 | GTP            |
| 5.944 | 3.11 | GTP            |
| 5.944 | 3.06 | GTP            |
| 5.944 | 2.98 | GTP            |
| 5.945 | 2.84 | GTP            |
| 5.945 | 2.71 | GTP            |
| 5.945 | 2.64 | GTP            |
| 5.946 | 2.62 | GTP            |
| 5.946 | 2.58 | GTP            |
| 5.946 | 2.51 | GTP            |
| 5.967 | 2.56 | NADH/NADPH/UMP |
| 5.967 | 2.57 | NADH/NADPH/UMP |
| 5.967 | 2.51 | NADH/NADPH/UMP |
| 5.971 | 2.54 | NADH/NADPH/UMP |
| 5.971 | 2.73 | NADH/NADPH/UMP |
| 5.972 | 2.88 | NADH/NADPH/UMP |
| 5.972 | 2.96 | NADH/NADPH/UMP |
| 5.972 | 2.99 | NADH/NADPH/UMP |
| 5.972 | 2.94 | NADH/NADPH/UMP |
| 5.973 | 2.83 | NADH/NADPH/UMP |
| 5.973 | 2.72 | NADH/NADPH/UMP |
| 5.973 | 2.65 | NADH/NADPH/UMP |
| 5.974 | 2.61 | NADH/NADPH/UMP |
| 5.974 | 2.59 | NADH/NADPH/UMP |
| 5.974 | 2.58 | NADH/NADPH/UMP |

|       |      |                |
|-------|------|----------------|
| 5.975 | 2.59 | NADH/NADPH/UMP |
| 5.975 | 2.62 | NADH/NADPH/UMP |
| 5.975 | 2.66 | NADH/NADPH/UMP |
| 5.976 | 2.72 | NADH/NADPH/UMP |
| 5.976 | 2.79 | NADH/NADPH/UMP |
| 5.976 | 2.83 | NADH/NADPH/UMP |
| 5.977 | 2.84 | NADH/NADPH/UMP |
| 5.977 | 2.82 | NADH/NADPH/UMP |
| 5.977 | 2.75 | NADH/NADPH/UMP |
| 5.977 | 2.63 | NADH/NADPH/UMP |
| 5.978 | 2.53 | NADH/NADPH/UMP |
| 6.448 | 2.53 | Unassigned 5   |
| 6.448 | 2.59 | Unassigned 5   |
| 6.526 | 2.51 | Fumarate       |
| 6.526 | 2.54 | Fumarate       |
| 6.677 | 2.67 | Unassigned 2   |
| 6.677 | 2.72 | Unassigned 2   |
| 6.677 | 2.58 | Unassigned 2   |
| 6.955 | 2.54 | NADH           |
| 7.260 | 2.50 | Tryptophan     |
| 7.260 | 2.56 | Tryptophan     |
| 7.260 | 2.59 | Tryptophan     |
| 7.261 | 2.59 | Tryptophan     |
| 7.261 | 2.57 | Tryptophan     |
| 7.261 | 2.52 | Tryptophan     |
| 8.013 | 2.51 | Unassigned 6   |
| 8.013 | 2.54 | Unassigned 6   |
| 8.586 | 2.65 | Unassigned 1   |
| 8.586 | 2.76 | Unassigned 1   |
| 8.587 | 2.75 | Unassigned 1   |
| 8.587 | 2.76 | Unassigned 1   |
| 8.587 | 2.83 | Unassigned 1   |
| 8.588 | 2.91 | Unassigned 1   |
| 8.588 | 2.98 | Unassigned 1   |
| 8.588 | 2.97 | Unassigned 1   |
| 8.589 | 2.87 | Unassigned 1   |
| 8.589 | 2.74 | Unassigned 1   |
| 8.589 | 2.65 | Unassigned 1   |
| 8.589 | 2.63 | Unassigned 1   |
| 8.590 | 2.63 | Unassigned 1   |
| 8.590 | 2.60 | Unassigned 1   |
| 8.590 | 2.50 | Unassigned 1   |
| 8.922 | 2.57 | Nicotinurate   |
| 8.922 | 2.64 | Nicotinurate   |
| 8.922 | 2.62 | Nicotinurate   |
| 8.923 | 2.50 | Nicotinurate   |
| 8.924 | 2.71 | Nicotinurate   |
| 8.924 | 2.81 | Nicotinurate   |
| 8.924 | 2.79 | Nicotinurate   |



|       |      |              |
|-------|------|--------------|
| 8.925 | 2.86 | Nicotinurate |
| 8.925 | 2.96 | Nicotinurate |
| 8.925 | 3.02 | Nicotinurate |
| 8.925 | 3.03 | Nicotinurate |
| 8.926 | 3.01 | Nicotinurate |
| 8.926 | 2.93 | Nicotinurate |
| 8.926 | 2.81 | Nicotinurate |
| 8.927 | 2.81 | Nicotinurate |
| 8.927 | 2.89 | Nicotinurate |
| 8.927 | 2.87 | Nicotinurate |
| 8.928 | 2.84 | Nicotinurate |
| 8.928 | 2.87 | Nicotinurate |
| 8.928 | 2.94 | Nicotinurate |
| 8.929 | 3.05 | Nicotinurate |
| 8.929 | 3.08 | Nicotinurate |
| 8.929 | 3.00 | Nicotinurate |
| 8.930 | 2.89 | Nicotinurate |
| 8.930 | 2.77 | Nicotinurate |
| 8.930 | 2.68 | Nicotinurate |
| 8.930 | 2.64 | Nicotinurate |
| 8.931 | 2.60 | Nicotinurate |
| 8.931 | 2.57 | Nicotinurate |
| 8.931 | 2.53 | Nicotinurate |
| 9.002 | 2.50 | Unassigned 3 |
| 9.002 | 2.67 | Unassigned 3 |
| 9.002 | 2.58 | Unassigned 3 |

**Table S3** Tukey HSD of ANOVA for quantified blood parameters from calves supplemented with different amino acids.

| Dependent Variable |      |      | Mean Difference (I-J) | Std. Error | Sig.  | 95% Confidence Bound |             |
|--------------------|------|------|-----------------------|------------|-------|----------------------|-------------|
|                    |      |      |                       |            |       | Lower Bound          | Upper Bound |
| Glucose            | Ctrl | FY   | -10.638               | 6.841      | 0.420 | -29.316              | 8.041       |
|                    |      | GP   | -5.975                | 6.841      | 0.818 | -24.653              | 12.703      |
|                    |      | MKT  | -6.525                | 6.841      | 0.776 | -25.203              | 12.153      |
|                    | FY   | Ctrl | 10.638                | 6.841      | 0.420 | -8.041               | 29.316      |
|                    |      | GP   | 4.663                 | 6.841      | 0.903 | -14.016              | 23.341      |
|                    |      | MKT  | 4.113                 | 6.841      | 0.931 | -14.566              | 22.791      |
|                    | GP   | Ctrl | 5.975                 | 6.841      | 0.818 | -12.703              | 24.653      |
|                    |      | FY   | -4.663                | 6.841      | 0.903 | -23.341              | 14.016      |
|                    |      | MKT  | -0.550                | 6.841      | 1.000 | -19.228              | 18.128      |
|                    | MKT  | Ctrl | 6.525                 | 6.841      | 0.776 | -12.153              | 25.203      |
|                    |      | FY   | -4.113                | 6.841      | 0.931 | -22.791              | 14.566      |
|                    |      | GP   | 0.550                 | 6.841      | 1.000 | -18.128              | 19.228      |
| Urea               | Ctrl | FY   | 0.700                 | 1.509      | 0.966 | -3.421               | 4.821       |
|                    |      | GP   | -2.863                | 1.509      | 0.252 | -6.983               | 1.258       |
|                    |      | MKT  | -1.088                | 1.509      | 0.888 | -5.208               | 3.033       |
|                    | FY   | Ctrl | -0.700                | 1.509      | 0.966 | -4.821               | 3.421       |
|                    |      | GP   | -3.563                | 1.509      | 0.109 | -7.683               | 0.558       |
|                    |      | MKT  | -1.788                | 1.509      | 0.641 | -5.908               | 2.333       |
|                    | GP   | Ctrl | 2.863                 | 1.509      | 0.252 | -1.258               | 6.983       |
|                    |      | FY   | 3.563                 | 1.509      | 0.109 | -0.558               | 7.683       |
|                    |      | MKT  | 1.775                 | 1.509      | 0.647 | -2.346               | 5.896       |
|                    | MKT  | Ctrl | 1.088                 | 1.509      | 0.888 | -3.033               | 5.208       |
|                    |      | FY   | 1.788                 | 1.509      | 0.641 | -2.333               | 5.908       |
|                    |      | GP   | -1.775                | 1.509      | 0.647 | -5.896               | 2.346       |
| Creatinine         | Ctrl | FY   | 0.034                 | 0.052      | 0.913 | -0.107               | 0.175       |
|                    |      | GP   | -0.078                | 0.052      | 0.450 | -0.218               | 0.063       |
|                    |      | MKT  | -0.109                | 0.052      | 0.175 | -0.250               | 0.032       |
|                    | FY   | Ctrl | -0.034                | 0.052      | 0.913 | -0.175               | 0.107       |
|                    |      | GP   | -0.111                | 0.052      | 0.160 | -0.252               | 0.030       |
|                    |      | MKT  | -.14250*              | 0.052      | 0.047 | -0.283               | -0.002      |
|                    | GP   | Ctrl | 0.078                 | 0.052      | 0.450 | -0.063               | 0.218       |
|                    |      | FY   | 0.111                 | 0.052      | 0.160 | -0.030               | 0.252       |
|                    |      | MKT  | -0.031                | 0.052      | 0.929 | -0.172               | 0.110       |
|                    | MKT  | Ctrl | 0.109                 | 0.052      | 0.175 | -0.032               | 0.250       |
|                    |      | FY   | .14250*               | 0.052      | 0.047 | 0.002                | 0.283       |
|                    |      | GP   | 0.031                 | 0.052      | 0.929 | -0.110               | 0.172       |
| Cholesterol        | Ctrl | FY   | -3.038                | 12.550     | 0.995 | -37.303              | 31.228      |
|                    |      | GP   | -0.263                | 12.550     | 1.000 | -34.528              | 34.003      |
|                    |      | MKT  | -7.725                | 12.550     | 0.926 | -41.990              | 26.540      |
|                    | FY   | Ctrl | 3.038                 | 12.550     | 0.995 | -31.228              | 37.303      |
|                    |      | GP   | 2.775                 | 12.550     | 0.996 | -31.490              | 37.040      |

|               |      |      |        |        |       |         |        |
|---------------|------|------|--------|--------|-------|---------|--------|
|               |      | MKT  | -4.687 | 12.550 | 0.982 | -38.953 | 29.578 |
|               | GP   | Ctrl | 0.263  | 12.550 | 1.000 | -34.003 | 34.528 |
|               |      | FY   | -2.775 | 12.550 | 0.996 | -37.040 | 31.490 |
|               |      | MKT  | -7.462 | 12.550 | 0.933 | -41.728 | 26.803 |
|               | MKT  | Ctrl | 7.725  | 12.550 | 0.926 | -26.540 | 41.990 |
|               |      | FY   | 4.687  | 12.550 | 0.982 | -29.578 | 38.953 |
|               |      | GP   | 7.462  | 12.550 | 0.933 | -26.803 | 41.728 |
| TGs           | Ctrl | FY   | 3.713  | 6.357  | 0.936 | -13.644 | 21.069 |
|               |      | GP   | -1.075 | 6.357  | 0.998 | -18.432 | 16.282 |
|               |      | MKT  | -3.600 | 6.357  | 0.941 | -20.957 | 13.757 |
|               | FY   | Ctrl | -3.713 | 6.357  | 0.936 | -21.069 | 13.644 |
|               |      | GP   | -4.788 | 6.357  | 0.875 | -22.144 | 12.569 |
|               |      | MKT  | -7.313 | 6.357  | 0.662 | -24.669 | 10.044 |
|               | GP   | Ctrl | 1.075  | 6.357  | 0.998 | -16.282 | 18.432 |
|               |      | FY   | 4.788  | 6.357  | 0.875 | -12.569 | 22.144 |
|               |      | MKT  | -2.525 | 6.357  | 0.978 | -19.882 | 14.832 |
|               | MKT  | Ctrl | 3.600  | 6.357  | 0.941 | -13.757 | 20.957 |
|               |      | FY   | 7.313  | 6.357  | 0.662 | -10.044 | 24.669 |
|               |      | GP   | 2.525  | 6.357  | 0.978 | -14.832 | 19.882 |
| NEFAs         | Ctrl | FY   | 0.014  | 0.036  | 0.980 | -0.084  | 0.111  |
|               |      | GP   | -0.013 | 0.036  | 0.985 | -0.110  | 0.085  |
|               |      | MKT  | -0.005 | 0.036  | 0.999 | -0.103  | 0.093  |
|               | FY   | Ctrl | -0.014 | 0.036  | 0.980 | -0.111  | 0.084  |
|               |      | GP   | -0.026 | 0.036  | 0.883 | -0.124  | 0.071  |
|               |      | MKT  | -0.019 | 0.036  | 0.953 | -0.116  | 0.079  |
|               | GP   | Ctrl | 0.013  | 0.036  | 0.985 | -0.085  | 0.110  |
|               |      | FY   | 0.026  | 0.036  | 0.883 | -0.071  | 0.124  |
|               |      | MKT  | 0.008  | 0.036  | 0.997 | -0.090  | 0.105  |
|               | MKT  | Ctrl | 0.005  | 0.036  | 0.999 | -0.093  | 0.103  |
|               |      | FY   | 0.019  | 0.036  | 0.953 | -0.079  | 0.116  |
|               |      | GP   | -0.008 | 0.036  | 0.997 | -0.105  | 0.090  |
| Total Protein | Ctrl | FY   | -0.173 | 0.183  | 0.782 | -0.672  | 0.327  |
|               |      | GP   | -0.026 | 0.183  | 0.999 | -0.526  | 0.473  |
|               |      | MKT  | -0.353 | 0.183  | 0.240 | -0.852  | 0.147  |
|               | FY   | Ctrl | 0.173  | 0.183  | 0.782 | -0.327  | 0.672  |
|               |      | GP   | 0.146  | 0.183  | 0.854 | -0.353  | 0.646  |
|               |      | MKT  | -0.180 | 0.183  | 0.760 | -0.680  | 0.320  |
|               | GP   | Ctrl | 0.026  | 0.183  | 0.999 | -0.473  | 0.526  |
|               |      | FY   | -0.146 | 0.183  | 0.854 | -0.646  | 0.353  |
|               |      | MKT  | -0.326 | 0.183  | 0.302 | -0.826  | 0.173  |
|               | MKT  | Ctrl | 0.353  | 0.183  | 0.240 | -0.147  | 0.852  |
|               |      | FY   | 0.180  | 0.183  | 0.760 | -0.320  | 0.680  |
|               |      | GP   | 0.326  | 0.183  | 0.302 | -0.173  | 0.826  |
| ALT           | Ctrl | FY   | 1.163  | 1.490  | 0.863 | -2.905  | 5.230  |
|               |      | GP   | -0.675 | 1.490  | 0.968 | -4.742  | 3.392  |
|               |      | MKT  | 0.238  | 1.490  | 0.999 | -3.830  | 4.305  |
|               | FY   | Ctrl | -1.163 | 1.490  | 0.863 | -5.230  | 2.905  |

|                 |      |      |        |       |       |         |        |
|-----------------|------|------|--------|-------|-------|---------|--------|
|                 |      | GP   | -1.838 | 1.490 | 0.611 | -5.905  | 2.230  |
|                 |      | MKT  | -0.925 | 1.490 | 0.924 | -4.992  | 3.142  |
|                 | GP   | Ctrl | 0.675  | 1.490 | 0.968 | -3.392  | 4.742  |
|                 |      | FY   | 1.838  | 1.490 | 0.611 | -2.230  | 5.905  |
|                 |      | MKT  | 0.913  | 1.490 | 0.927 | -3.155  | 4.980  |
|                 | MKT  | Ctrl | -0.238 | 1.490 | 0.999 | -4.305  | 3.830  |
|                 |      | FY   | 0.925  | 1.490 | 0.924 | -3.142  | 4.992  |
|                 |      | GP   | -0.913 | 1.490 | 0.927 | -4.980  | 3.155  |
| AST             | Ctrl | FY   | 4.000  | 7.157 | 0.943 | -15.542 | 23.542 |
|                 |      | GP   | -2.125 | 7.157 | 0.991 | -21.667 | 17.417 |
|                 |      | MKT  | -4.750 | 7.157 | 0.910 | -24.292 | 14.792 |
|                 | FY   | Ctrl | -4.000 | 7.157 | 0.943 | -23.542 | 15.542 |
|                 |      | GP   | -6.125 | 7.157 | 0.827 | -25.667 | 13.417 |
|                 |      | MKT  | -8.750 | 7.157 | 0.618 | -28.292 | 10.792 |
|                 | GP   | Ctrl | 2.125  | 7.157 | 0.991 | -17.417 | 21.667 |
|                 |      | FY   | 6.125  | 7.157 | 0.827 | -13.417 | 25.667 |
|                 |      | MKT  | -2.625 | 7.157 | 0.983 | -22.167 | 16.917 |
|                 | MKT  | Ctrl | 4.750  | 7.157 | 0.910 | -14.792 | 24.292 |
|                 |      | FY   | 8.750  | 7.157 | 0.618 | -10.792 | 28.292 |
|                 |      | GP   | 2.625  | 7.157 | 0.983 | -16.917 | 22.167 |
| GGT             | Ctrl | FY   | 1.875  | 1.987 | 0.782 | -3.550  | 7.300  |
|                 |      | GP   | 4.250  | 1.987 | 0.166 | -1.175  | 9.675  |
|                 |      | MKT  | 0.625  | 1.987 | 0.989 | -4.800  | 6.050  |
|                 | FY   | Ctrl | -1.875 | 1.987 | 0.782 | -7.300  | 3.550  |
|                 |      | GP   | 2.375  | 1.987 | 0.635 | -3.050  | 7.800  |
|                 |      | MKT  | -1.250 | 1.987 | 0.922 | -6.675  | 4.175  |
|                 | GP   | Ctrl | -4.250 | 1.987 | 0.166 | -9.675  | 1.175  |
|                 |      | FY   | -2.375 | 1.987 | 0.635 | -7.800  | 3.050  |
|                 |      | MKT  | -3.625 | 1.987 | 0.284 | -9.050  | 1.800  |
|                 | MKT  | Ctrl | -0.625 | 1.987 | 0.989 | -6.050  | 4.800  |
|                 |      | FY   | 1.250  | 1.987 | 0.922 | -4.175  | 6.675  |
|                 |      | GP   | 3.625  | 1.987 | 0.284 | -1.800  | 9.050  |
| Haptoglo<br>bin | Ctrl | FY   | -0.054 | 0.047 | 0.664 | -0.182  | 0.074  |
|                 |      | GP   | -0.005 | 0.047 | 1.000 | -0.133  | 0.123  |
|                 |      | MKT  | -0.036 | 0.047 | 0.866 | -0.164  | 0.092  |
|                 | FY   | Ctrl | 0.054  | 0.047 | 0.664 | -0.074  | 0.182  |
|                 |      | GP   | 0.049  | 0.047 | 0.727 | -0.079  | 0.177  |
|                 |      | MKT  | 0.018  | 0.047 | 0.982 | -0.110  | 0.145  |
|                 | GP   | Ctrl | 0.005  | 0.047 | 1.000 | -0.123  | 0.133  |
|                 |      | FY   | -0.049 | 0.047 | 0.727 | -0.177  | 0.079  |
|                 |      | MKT  | -0.031 | 0.047 | 0.909 | -0.159  | 0.097  |
|                 | MKT  | Ctrl | 0.036  | 0.047 | 0.866 | -0.092  | 0.164  |
|                 |      | FY   | -0.018 | 0.047 | 0.982 | -0.145  | 0.110  |
|                 |      | GP   | 0.031  | 0.047 | 0.909 | -0.097  | 0.159  |
| Insulin         | Ctrl | FY   | -0.096 | 0.245 | 0.979 | -0.764  | 0.572  |
|                 |      | GP   | -0.286 | 0.245 | 0.650 | -0.954  | 0.382  |
|                 |      | MKT  | -0.314 | 0.245 | 0.580 | -0.982  | 0.354  |

|         |      |      |         |        |       |          |         |
|---------|------|------|---------|--------|-------|----------|---------|
|         | FY   | Ctrl | 0.096   | 0.245  | 0.979 | -0.572   | 0.764   |
|         |      | GP   | -0.190  | 0.245  | 0.864 | -0.858   | 0.477   |
|         |      | MKT  | -0.218  | 0.245  | 0.809 | -0.886   | 0.449   |
|         | GP   | Ctrl | 0.286   | 0.245  | 0.650 | -0.382   | 0.954   |
|         |      | FY   | 0.190   | 0.245  | 0.864 | -0.477   | 0.858   |
|         |      | MKT  | -0.028  | 0.245  | 0.999 | -0.696   | 0.640   |
|         | MKT  | Ctrl | 0.314   | 0.245  | 0.580 | -0.354   | 0.982   |
|         |      | FY   | 0.218   | 0.245  | 0.809 | -0.449   | 0.886   |
|         |      | GP   | 0.028   | 0.245  | 0.999 | -0.640   | 0.696   |
| IGF-I   | Ctrl | FY   | 18.529  | 46.016 | 0.977 | -107.109 | 144.168 |
|         |      | GP   | -17.817 | 46.016 | 0.980 | -143.455 | 107.821 |
|         |      | MKT  | -54.141 | 46.016 | 0.646 | -179.779 | 71.497  |
|         | FY   | Ctrl | -18.529 | 46.016 | 0.977 | -144.168 | 107.109 |
|         |      | GP   | -36.346 | 46.016 | 0.858 | -161.984 | 89.292  |
|         |      | MKT  | -72.671 | 46.016 | 0.406 | -198.309 | 52.968  |
|         | GP   | Ctrl | 17.817  | 46.016 | 0.980 | -107.821 | 143.455 |
|         |      | FY   | 36.346  | 46.016 | 0.858 | -89.292  | 161.984 |
|         |      | MKT  | -36.324 | 46.016 | 0.859 | -161.962 | 89.314  |
|         | MKT  | Ctrl | 54.141  | 46.016 | 0.646 | -71.497  | 179.779 |
|         |      | FY   | 72.671  | 46.016 | 0.406 | -52.968  | 198.309 |
|         |      | GP   | 36.324  | 46.016 | 0.859 | -89.314  | 161.962 |
| Asn/Ser | Ctrl | FY   | -11.279 | 24.759 | 0.968 | -78.879  | 56.321  |
|         |      | GP   | -17.528 | 24.759 | 0.893 | -85.129  | 50.072  |
|         |      | MKT  | -12.668 | 24.759 | 0.956 | -80.268  | 54.932  |
|         | FY   | Ctrl | 11.279  | 24.759 | 0.968 | -56.321  | 78.879  |
|         |      | GP   | -6.249  | 24.759 | 0.994 | -73.849  | 61.351  |
|         |      | MKT  | -1.389  | 24.759 | 1.000 | -68.989  | 66.211  |
|         | GP   | Ctrl | 17.528  | 24.759 | 0.893 | -50.072  | 85.129  |
|         |      | FY   | 6.249   | 24.759 | 0.994 | -61.351  | 73.849  |
|         |      | MKT  | 4.860   | 24.759 | 0.997 | -62.740  | 72.461  |
|         | MKT  | Ctrl | 12.668  | 24.759 | 0.956 | -54.932  | 80.268  |
|         |      | FY   | 1.389   | 24.759 | 1.000 | -66.211  | 68.989  |
|         |      | GP   | -4.860  | 24.759 | 0.997 | -72.461  | 62.740  |
| Glu     | Ctrl | FY   | 12.634  | 8.519  | 0.461 | -10.625  | 35.892  |
|         |      | GP   | 9.874   | 8.519  | 0.657 | -13.385  | 33.132  |
|         |      | MKT  | 2.777   | 8.519  | 0.988 | -20.481  | 26.035  |
|         | FY   | Ctrl | -12.634 | 8.519  | 0.461 | -35.892  | 10.625  |
|         |      | GP   | -2.760  | 8.519  | 0.988 | -26.019  | 20.498  |
|         |      | MKT  | -9.857  | 8.519  | 0.658 | -33.115  | 13.402  |
|         | GP   | Ctrl | -9.874  | 8.519  | 0.657 | -33.132  | 13.385  |
|         |      | FY   | 2.760   | 8.519  | 0.988 | -20.498  | 26.019  |
|         |      | MKT  | -7.097  | 8.519  | 0.838 | -30.355  | 16.162  |
|         | MKT  | Ctrl | -2.777  | 8.519  | 0.988 | -26.035  | 20.481  |
|         |      | FY   | 9.857   | 8.519  | 0.658 | -13.402  | 33.115  |
|         |      | GP   | 7.097   | 8.519  | 0.838 | -16.162  | 30.355  |
| Gly     | Ctrl | FY   | -13.827 | 31.406 | 0.971 | -99.771  | 72.117  |
|         |      | GP   | -45.272 | 31.406 | 0.485 | -131.216 | 40.672  |

|         |      |      |                       |        |       |          |         |
|---------|------|------|-----------------------|--------|-------|----------|---------|
|         |      | MKT  | -41.445               | 31.406 | 0.559 | -127.389 | 44.499  |
|         | FY   | Ctrl | 13.827                | 31.406 | 0.971 | -72.117  | 99.771  |
|         |      | GP   | -31.446               | 30.341 | 0.730 | -114.475 | 51.584  |
|         |      | MKT  | -27.619               | 30.341 | 0.800 | -110.649 | 55.411  |
|         | GP   | Ctrl | 45.272                | 31.406 | 0.485 | -40.672  | 131.216 |
|         |      | FY   | 31.446                | 30.341 | 0.730 | -51.584  | 114.475 |
|         |      | MKT  | 3.827                 | 30.341 | 0.999 | -79.203  | 86.856  |
|         | MKT  | Ctrl | 41.445                | 31.406 | 0.559 | -44.499  | 127.389 |
|         |      | FY   | 27.619                | 30.341 | 0.800 | -55.411  | 110.649 |
|         |      | GP   | -3.827                | 30.341 | 0.999 | -86.856  | 79.203  |
| His/Gln | Ctrl | FY   | 1.315                 | 50.898 | 1.000 | -137.652 | 140.283 |
|         |      | GP   | -16.956               | 50.898 | 0.987 | -155.923 | 122.012 |
|         |      | MKT  | -16.892               | 50.898 | 0.987 | -155.860 | 122.075 |
|         | FY   | Ctrl | -1.315                | 50.898 | 1.000 | -140.283 | 137.652 |
|         |      | GP   | -18.271               | 50.898 | 0.984 | -157.238 | 120.696 |
|         |      | MKT  | -18.207               | 50.898 | 0.984 | -157.175 | 120.760 |
|         | GP   | Ctrl | 16.956                | 50.898 | 0.987 | -122.012 | 155.923 |
|         |      | FY   | 18.271                | 50.898 | 0.984 | -120.696 | 157.238 |
|         |      | MKT  | 0.064                 | 50.898 | 1.000 | -138.904 | 139.031 |
|         | MKT  | Ctrl | 16.892                | 50.898 | 0.987 | -122.075 | 155.860 |
|         |      | FY   | 18.207                | 50.898 | 0.984 | -120.760 | 157.175 |
|         |      | GP   | -0.064                | 50.898 | 1.000 | -139.031 | 138.904 |
| Arg     | Ctrl | FY   | -13.023               | 29.495 | 0.971 | -93.554  | 67.508  |
|         |      | GP   | -40.439               | 29.495 | 0.527 | -120.970 | 40.092  |
|         |      | MKT  | -68.170               | 29.495 | 0.120 | -148.702 | 12.361  |
|         | FY   | Ctrl | 13.023                | 29.495 | 0.971 | -67.508  | 93.554  |
|         |      | GP   | -27.416               | 29.495 | 0.789 | -107.947 | 53.115  |
|         |      | MKT  | -55.147               | 29.495 | 0.264 | -135.678 | 25.384  |
|         | GP   | Ctrl | 40.439                | 29.495 | 0.527 | -40.092  | 120.970 |
|         |      | FY   | 27.416                | 29.495 | 0.789 | -53.115  | 107.947 |
|         |      | MKT  | -27.731               | 29.495 | 0.784 | -108.263 | 52.800  |
|         | MKT  | Ctrl | 68.170                | 29.495 | 0.120 | -12.361  | 148.702 |
|         |      | FY   | 55.147                | 29.495 | 0.264 | -25.384  | 135.678 |
|         |      | GP   | 27.731                | 29.495 | 0.784 | -52.800  | 108.263 |
| Thr     | Ctrl | FY   | 0.602                 | 32.337 | 1.000 | -87.688  | 88.891  |
|         |      | GP   | -5.682                | 32.337 | 0.998 | -93.971  | 82.608  |
|         |      | MKT  | 15.82824 <sup>*</sup> | 32.337 | 0.007 | -204.118 | -27.539 |
|         | FY   | Ctrl | -0.602                | 32.337 | 1.000 | -88.891  | 87.688  |
|         |      | GP   | -6.283                | 32.337 | 0.997 | -94.572  | 82.006  |
|         |      | MKT  | 16.42975 <sup>*</sup> | 32.337 | 0.006 | -204.719 | -28.140 |
|         | GP   | Ctrl | 5.682                 | 32.337 | 0.998 | -82.608  | 93.971  |
|         |      | FY   | 6.283                 | 32.337 | 0.997 | -82.006  | 94.572  |
|         |      | MKT  | 10.14663 <sup>*</sup> | 32.337 | 0.010 | -198.436 | -21.857 |
|         | MKT  | Ctrl | 15.82824 <sup>*</sup> | 32.337 | 0.007 | 27.539   | 204.118 |
|         |      | FY   | 16.42975 <sup>*</sup> | 32.337 | 0.006 | 28.140   | 204.719 |
|         |      | GP   | 10.14663 <sup>*</sup> | 32.337 | 0.010 | 21.857   | 198.436 |

|     |      |      |         |        |       |          |         |
|-----|------|------|---------|--------|-------|----------|---------|
| Ala | Ctrl | FY   | 6.074   | 29.525 | 0.997 | -74.537  | 86.686  |
|     |      | GP   | 8.000   | 29.525 | 0.993 | -72.611  | 88.612  |
|     |      | MKT  | -22.706 | 29.525 | 0.868 | -103.317 | 57.905  |
|     | FY   | Ctrl | -6.074  | 29.525 | 0.997 | -86.686  | 74.537  |
|     |      | GP   | 1.926   | 29.525 | 1.000 | -78.685  | 82.537  |
|     |      | MKT  | -28.781 | 29.525 | 0.765 | -109.392 | 51.831  |
|     | GP   | Ctrl | -8.000  | 29.525 | 0.993 | -88.612  | 72.611  |
|     |      | FY   | -1.926  | 29.525 | 1.000 | -82.537  | 78.685  |
|     |      | MKT  | -30.707 | 29.525 | 0.728 | -111.318 | 49.905  |
|     | MKT  | Ctrl | 22.706  | 29.525 | 0.868 | -57.905  | 103.317 |
|     |      | FY   | 28.781  | 29.525 | 0.765 | -51.831  | 109.392 |
|     |      | GP   | 30.707  | 29.525 | 0.728 | -49.905  | 111.318 |
| Pro | Ctrl | FY   | -3.856  | 22.452 | 0.998 | -65.156  | 57.444  |
|     |      | GP   | -26.240 | 22.452 | 0.651 | -87.540  | 35.061  |
|     |      | MKT  | -9.899  | 22.452 | 0.971 | -71.199  | 51.401  |
|     | FY   | Ctrl | 3.856   | 22.452 | 0.998 | -57.444  | 65.156  |
|     |      | GP   | -22.384 | 22.452 | 0.752 | -83.684  | 38.917  |
|     |      | MKT  | -6.043  | 22.452 | 0.993 | -67.343  | 55.257  |
|     | GP   | Ctrl | 26.240  | 22.452 | 0.651 | -35.061  | 87.540  |
|     |      | FY   | 22.384  | 22.452 | 0.752 | -38.917  | 83.684  |
|     |      | MKT  | 16.341  | 22.452 | 0.885 | -44.960  | 77.641  |
|     | MKT  | Ctrl | 9.899   | 22.452 | 0.971 | -51.401  | 71.199  |
|     |      | FY   | 6.043   | 22.452 | 0.993 | -55.257  | 67.343  |
|     |      | GP   | -16.341 | 22.452 | 0.885 | -77.641  | 44.960  |
| Cys | Ctrl | FY   | 0.047   | 8.542  | 1.000 | -23.275  | 23.369  |
|     |      | GP   | 0.690   | 8.542  | 1.000 | -22.632  | 24.012  |
|     |      | MKT  | -1.411  | 8.542  | 0.998 | -24.733  | 21.911  |
|     | FY   | Ctrl | -0.047  | 8.542  | 1.000 | -23.369  | 23.275  |
|     |      | GP   | 0.643   | 8.542  | 1.000 | -22.679  | 23.965  |
|     |      | MKT  | -1.458  | 8.542  | 0.998 | -24.780  | 21.864  |
|     | GP   | Ctrl | -0.690  | 8.542  | 1.000 | -24.012  | 22.632  |
|     |      | FY   | -0.643  | 8.542  | 1.000 | -23.965  | 22.679  |
|     |      | MKT  | -2.101  | 8.542  | 0.995 | -25.423  | 21.221  |
|     | MKT  | Ctrl | 1.411   | 8.542  | 0.998 | -21.911  | 24.733  |
|     |      | FY   | 1.458   | 8.542  | 0.998 | -21.864  | 24.780  |
|     |      | GP   | 2.101   | 8.542  | 0.995 | -21.221  | 25.423  |
| Tyr | Ctrl | FY   | -20.047 | 14.490 | 0.520 | -59.610  | 19.517  |
|     |      | GP   | -2.876  | 14.490 | 0.997 | -42.440  | 36.687  |
|     |      | MKT  | -0.430  | 14.490 | 1.000 | -39.994  | 39.133  |
|     | FY   | Ctrl | 20.047  | 14.490 | 0.520 | -19.517  | 59.610  |
|     |      | GP   | 17.170  | 14.490 | 0.641 | -22.393  | 56.734  |
|     |      | MKT  | 19.617  | 14.490 | 0.538 | -19.947  | 59.180  |
|     | GP   | Ctrl | 2.876   | 14.490 | 0.997 | -36.687  | 42.440  |
|     |      | FY   | -17.170 | 14.490 | 0.641 | -56.734  | 22.393  |
|     |      | MKT  | 2.446   | 14.490 | 0.998 | -37.117  | 42.010  |
|     | MKT  | Ctrl | 0.430   | 14.490 | 1.000 | -39.133  | 39.994  |
|     |      | FY   | -19.617 | 14.490 | 0.538 | -59.180  | 19.947  |

|     |      |      |           |        |       |          |         |
|-----|------|------|-----------|--------|-------|----------|---------|
|     |      | GP   | -2.446    | 14.490 | 0.998 | -42.010  | 37.117  |
| Val | Ctrl | FY   | 8.587     | 34.655 | 0.995 | -86.032  | 103.206 |
|     |      | GP   | 7.358     | 34.655 | 0.997 | -87.261  | 101.977 |
|     |      | MKT  | 13.190    | 34.655 | 0.981 | -81.429  | 107.809 |
|     | FY   | Ctrl | -8.587    | 34.655 | 0.995 | -103.206 | 86.032  |
|     |      | GP   | -1.229    | 34.655 | 1.000 | -95.848  | 93.390  |
|     |      | MKT  | 4.603     | 34.655 | 0.999 | -90.016  | 99.222  |
|     | GP   | Ctrl | -7.358    | 34.655 | 0.997 | -101.977 | 87.261  |
|     |      | FY   | 1.229     | 34.655 | 1.000 | -93.390  | 95.848  |
|     |      | MKT  | 5.832     | 34.655 | 0.998 | -88.787  | 100.451 |
|     | MKT  | Ctrl | -13.190   | 34.655 | 0.981 | -107.809 | 81.429  |
|     |      | FY   | -4.603    | 34.655 | 0.999 | -99.222  | 90.016  |
|     |      | GP   | -5.832    | 34.655 | 0.998 | -100.451 | 88.787  |
| Met | Ctrl | FY   | 0.263     | 8.942  | 1.000 | -24.153  | 24.679  |
|     |      | GP   | 0.988     | 8.942  | 1.000 | -23.428  | 25.403  |
|     |      | MKT  | 37.22313* | 8.942  | 0.001 | -61.639  | -12.807 |
|     | FY   | Ctrl | -0.263    | 8.942  | 1.000 | -24.679  | 24.153  |
|     |      | GP   | 0.724     | 8.942  | 1.000 | -23.691  | 25.140  |
|     |      | MKT  | 37.48630* | 8.942  | 0.001 | -61.902  | -13.071 |
|     | GP   | Ctrl | -0.988    | 8.942  | 1.000 | -25.403  | 23.428  |
|     |      | FY   | -0.724    | 8.942  | 1.000 | -25.140  | 23.691  |
|     |      | MKT  | 38.21068* | 8.942  | 0.001 | -62.626  | -13.795 |
|     | MKT  | Ctrl | 37.22313* | 8.942  | 0.001 | 12.807   | 61.639  |
|     |      | FY   | 37.48630* | 8.942  | 0.001 | 13.071   | 61.902  |
|     |      | GP   | 38.21068* | 8.942  | 0.001 | 13.795   | 62.626  |
| Lys | Ctrl | FY   | -20.507   | 42.963 | 0.963 | -137.810 | 96.796  |
|     |      | GP   | -11.095   | 42.963 | 0.994 | -128.398 | 106.208 |
|     |      | MKT  | -84.041   | 42.963 | 0.229 | -201.343 | 33.262  |
|     | FY   | Ctrl | 20.507    | 42.963 | 0.963 | -96.796  | 137.810 |
|     |      | GP   | 9.412     | 42.963 | 0.996 | -107.891 | 126.715 |
|     |      | MKT  | -63.533   | 42.963 | 0.463 | -180.836 | 53.770  |
|     | GP   | Ctrl | 11.095    | 42.963 | 0.994 | -106.208 | 128.398 |
|     |      | FY   | -9.412    | 42.963 | 0.996 | -126.715 | 107.891 |
|     |      | MKT  | -72.946   | 42.963 | 0.344 | -190.249 | 44.357  |
|     | MKT  | Ctrl | 84.041    | 42.963 | 0.229 | -33.262  | 201.343 |
|     |      | FY   | 63.533    | 42.963 | 0.463 | -53.770  | 180.836 |
|     |      | GP   | 72.946    | 42.963 | 0.344 | -44.357  | 190.249 |
| Ile | Ctrl | FY   | 2.347     | 16.993 | 0.999 | -44.050  | 48.744  |
|     |      | GP   | 6.331     | 16.993 | 0.982 | -40.066  | 52.728  |
|     |      | MKT  | 7.469     | 16.993 | 0.971 | -38.928  | 53.866  |
|     | FY   | Ctrl | -2.347    | 16.993 | 0.999 | -48.744  | 44.050  |
|     |      | GP   | 3.984     | 16.993 | 0.995 | -42.413  | 50.381  |
|     |      | MKT  | 5.123     | 16.993 | 0.990 | -41.274  | 51.520  |
|     | GP   | Ctrl | -6.331    | 16.993 | 0.982 | -52.728  | 40.066  |
|     |      | FY   | -3.984    | 16.993 | 0.995 | -50.381  | 42.413  |
|     |      | MKT  | 1.138     | 16.993 | 1.000 | -45.259  | 47.535  |



|     |      |      |           |        |       |          |         |
|-----|------|------|-----------|--------|-------|----------|---------|
|     | MKT  | Ctrl | -7.469    | 16.993 | 0.971 | -53.866  | 38.928  |
|     |      | FY   | -5.123    | 16.993 | 0.990 | -51.520  | 41.274  |
|     |      | GP   | -1.138    | 16.993 | 1.000 | -47.535  | 45.259  |
| Leu | Ctrl | FY   | 6.630     | 29.532 | 0.996 | -74.002  | 87.262  |
|     |      | GP   | 13.832    | 29.532 | 0.965 | -66.800  | 94.464  |
|     |      | MKT  | 23.157    | 29.532 | 0.861 | -57.475  | 103.789 |
|     | FY   | Ctrl | -6.630    | 29.532 | 0.996 | -87.262  | 74.002  |
|     |      | GP   | 7.202     | 29.532 | 0.995 | -73.430  | 87.834  |
|     |      | MKT  | 16.527    | 29.532 | 0.943 | -64.104  | 97.159  |
|     | GP   | Ctrl | -13.832   | 29.532 | 0.965 | -94.464  | 66.800  |
|     |      | FY   | -7.202    | 29.532 | 0.995 | -87.834  | 73.430  |
|     |      | MKT  | 9.325     | 29.532 | 0.989 | -71.306  | 89.957  |
|     | MKT  | Ctrl | -23.157   | 29.532 | 0.861 | -103.789 | 57.475  |
|     |      | FY   | -16.527   | 29.532 | 0.943 | -97.159  | 64.104  |
|     |      | GP   | -9.325    | 29.532 | 0.989 | -89.957  | 71.306  |
| Phe | Ctrl | FY   | -22.587   | 8.881  | 0.075 | -46.834  | 1.661   |
|     |      | GP   | -1.087    | 8.881  | 0.999 | -25.334  | 23.160  |
|     |      | MKT  | 4.264     | 8.881  | 0.963 | -19.983  | 28.511  |
|     | FY   | Ctrl | 22.587    | 8.881  | 0.075 | -1.661   | 46.834  |
|     |      | GP   | 21.500    | 8.881  | 0.096 | -2.748   | 45.747  |
|     |      | MKT  | 26.85050* | 8.881  | 0.026 | 2.603    | 51.098  |
|     | GP   | Ctrl | 1.087     | 8.881  | 0.999 | -23.160  | 25.334  |
|     |      | FY   | -21.500   | 8.881  | 0.096 | -45.747  | 2.748   |
|     |      | MKT  | 5.351     | 8.881  | 0.930 | -18.896  | 29.598  |
|     | MKT  | Ctrl | -4.264    | 8.881  | 0.963 | -28.511  | 19.983  |
|     |      | FY   | 26.85050* | 8.881  | 0.026 | -51.098  | -2.603  |
|     |      | GP   | -5.351    | 8.881  | 0.930 | -29.598  | 18.896  |
| Trp | Ctrl | FY   | -2.468    | 8.346  | 0.991 | -25.255  | 20.320  |
|     |      | GP   | -6.313    | 8.346  | 0.873 | -29.101  | 16.474  |
|     |      | MKT  | -5.052    | 8.346  | 0.930 | -27.840  | 17.735  |
|     | FY   | Ctrl | 2.468     | 8.346  | 0.991 | -20.320  | 25.255  |
|     |      | GP   | -3.846    | 8.346  | 0.967 | -26.633  | 18.942  |
|     |      | MKT  | -2.585    | 8.346  | 0.989 | -25.372  | 20.203  |
|     | GP   | Ctrl | 6.313     | 8.346  | 0.873 | -16.474  | 29.101  |
|     |      | FY   | 3.846     | 8.346  | 0.967 | -18.942  | 26.633  |
|     |      | MKT  | 1.261     | 8.346  | 0.999 | -21.527  | 24.049  |
|     | MKT  | Ctrl | 5.052     | 8.346  | 0.930 | -17.735  | 27.840  |
|     |      | FY   | 2.585     | 8.346  | 0.989 | -20.203  | 25.372  |
|     |      | GP   | -1.261    | 8.346  | 0.999 | -24.049  | 21.527  |

Data from dairy calves fed with control milk replacer (Ctrl); milk replacer supplemented with glycine and proline (GP); milk replacer supplemented with phenylalanine and tyrosine (FY) and milk replacer supplemented with lysine, methionine and threonine (MKT) (n=8 per group).

\*: The mean difference is significant at the 0.05 level.

**Table S4** Tukey HSD of ANOVA for quantified muscle metabolites from calves supplemented with different amino acids.

| Dependent Variable |      |      | Mean Difference (I-J) | Std. Error | Sig.  | 95% Confidence |             |
|--------------------|------|------|-----------------------|------------|-------|----------------|-------------|
|                    |      |      |                       |            |       | Lower Bound    | Upper Bound |
| 3-Hydroxybutyrate  | Ctrl | FY   | -0.082                | 0.045      | 0.276 | -0.205         | 0.040       |
|                    |      | GP   | -0.019                | 0.045      | 0.972 | -0.142         | 0.103       |
|                    |      | MKT  | 0.008                 | 0.043      | 0.998 | -0.111         | 0.126       |
|                    | FY   | Ctrl | 0.082                 | 0.045      | 0.276 | -0.040         | 0.205       |
|                    |      | GP   | 0.063                 | 0.046      | 0.530 | -0.063         | 0.190       |
|                    |      | MKT  | 0.090                 | 0.045      | 0.206 | -0.032         | 0.213       |
|                    | GP   | Ctrl | 0.019                 | 0.045      | 0.972 | -0.103         | 0.142       |
|                    |      | FY   | -0.063                | 0.046      | 0.530 | -0.190         | 0.063       |
|                    |      | MKT  | 0.027                 | 0.045      | 0.929 | -0.095         | 0.150       |
|                    | MKT  | Ctrl | -0.008                | 0.043      | 0.998 | -0.126         | 0.111       |
|                    |      | FY   | -0.090                | 0.045      | 0.206 | -0.213         | 0.032       |
|                    |      | GP   | -0.027                | 0.045      | 0.929 | -0.150         | 0.095       |
| Acetate            | Ctrl | FY   | -0.004                | 0.113      | 1.000 | -0.313         | 0.305       |
|                    |      | GP   | 0.035                 | 0.113      | 0.990 | -0.275         | 0.344       |
|                    |      | MKT  | 0.059                 | 0.109      | 0.948 | -0.240         | 0.357       |
|                    | FY   | Ctrl | 0.004                 | 0.113      | 1.000 | -0.305         | 0.313       |
|                    |      | GP   | 0.039                 | 0.116      | 0.987 | -0.280         | 0.358       |
|                    |      | MKT  | 0.063                 | 0.113      | 0.943 | -0.246         | 0.372       |
|                    | GP   | Ctrl | -0.035                | 0.113      | 0.990 | -0.344         | 0.275       |
|                    |      | FY   | -0.039                | 0.116      | 0.987 | -0.358         | 0.280       |
|                    |      | MKT  | 0.024                 | 0.113      | 0.996 | -0.285         | 0.333       |
|                    | MKT  | Ctrl | -0.059                | 0.109      | 0.948 | -0.357         | 0.240       |
|                    |      | FY   | -0.063                | 0.113      | 0.943 | -0.372         | 0.246       |
|                    |      | GP   | -0.024                | 0.113      | 0.996 | -0.333         | 0.285       |
| ADP+ATP+AMP        | Ctrl | FY   | 1.139                 | 6.268      | 0.998 | -16.055        | 18.333      |
|                    |      | GP   | -3.324                | 6.268      | 0.951 | -20.518        | 13.870      |
|                    |      | MKT  | 3.667                 | 6.055      | 0.929 | -12.944        | 20.278      |
|                    | FY   | Ctrl | -1.139                | 6.268      | 0.998 | -18.333        | 16.055      |
|                    |      | GP   | -4.462                | 6.473      | 0.900 | -22.220        | 13.296      |
|                    |      | MKT  | 2.528                 | 6.268      | 0.977 | -14.666        | 19.722      |
|                    | GP   | Ctrl | 3.324                 | 6.268      | 0.951 | -13.870        | 20.518      |
|                    |      | FY   | 4.462                 | 6.473      | 0.900 | -13.296        | 22.220      |
|                    |      | MKT  | 6.990                 | 6.268      | 0.684 | -10.204        | 24.184      |
|                    | MKT  | Ctrl | -3.667                | 6.055      | 0.929 | -20.278        | 12.944      |
|                    |      | FY   | -2.528                | 6.268      | 0.977 | -19.722        | 14.666      |
|                    |      | GP   | -6.990                | 6.268      | 0.684 | -24.184        | 10.204      |
| Alanine            | Ctrl | FY   | 0.707                 | 1.752      | 0.977 | -4.100         | 5.514       |
|                    |      | GP   | 0.428                 | 1.752      | 0.995 | -4.378         | 5.235       |
|                    |      | MKT  | 0.118                 | 1.693      | 1.000 | -4.525         | 4.762       |
|                    | FY   | Ctrl | -0.707                | 1.752      | 0.977 | -5.514         | 4.100       |
|                    |      | GP   | -0.279                | 1.810      | 0.999 | -5.243         | 4.685       |

|            |      |      |        |       |       |         |        |
|------------|------|------|--------|-------|-------|---------|--------|
|            |      | MKT  | -0.589 | 1.752 | 0.987 | -5.395  | 4.218  |
|            | GP   | Ctrl | -0.428 | 1.752 | 0.995 | -5.235  | 4.378  |
|            |      | FY   | 0.279  | 1.810 | 0.999 | -4.685  | 5.243  |
|            |      | MKT  | -0.310 | 1.752 | 0.998 | -5.116  | 4.497  |
|            | MKT  | Ctrl | -0.118 | 1.693 | 1.000 | -4.762  | 4.525  |
|            |      | FY   | 0.589  | 1.752 | 0.987 | -4.218  | 5.395  |
|            |      | GP   | 0.310  | 1.752 | 0.998 | -4.497  | 5.116  |
| Anserine   | Ctrl | FY   | -1.455 | 3.099 | 0.965 | -9.956  | 7.046  |
|            |      | GP   | -3.357 | 3.099 | 0.702 | -11.859 | 5.144  |
|            |      | MKT  | 0.374  | 2.994 | 0.999 | -7.839  | 8.587  |
|            | FY   | Ctrl | 1.455  | 3.099 | 0.965 | -7.046  | 9.956  |
|            |      | GP   | -1.902 | 3.200 | 0.933 | -10.682 | 6.878  |
|            |      | MKT  | 1.829  | 3.099 | 0.934 | -6.672  | 10.330 |
|            | GP   | Ctrl | 3.357  | 3.099 | 0.702 | -5.144  | 11.859 |
|            |      | FY   | 1.902  | 3.200 | 0.933 | -6.878  | 10.682 |
|            |      | MKT  | 3.731  | 3.099 | 0.630 | -4.770  | 12.233 |
|            | MKT  | Ctrl | -0.374 | 2.994 | 0.999 | -8.587  | 7.839  |
|            |      | FY   | -1.829 | 3.099 | 0.934 | -10.330 | 6.672  |
|            |      | GP   | -3.731 | 3.099 | 0.630 | -12.233 | 4.770  |
| Aspartate  | Ctrl | FY   | -0.093 | 0.146 | 0.919 | -0.494  | 0.308  |
|            |      | GP   | 0.117  | 0.146 | 0.854 | -0.284  | 0.518  |
|            |      | MKT  | -0.019 | 0.141 | 0.999 | -0.406  | 0.368  |
|            | FY   | Ctrl | 0.093  | 0.146 | 0.919 | -0.308  | 0.494  |
|            |      | GP   | 0.210  | 0.151 | 0.516 | -0.204  | 0.624  |
|            |      | MKT  | 0.074  | 0.146 | 0.956 | -0.327  | 0.475  |
|            | GP   | Ctrl | -0.117 | 0.146 | 0.854 | -0.518  | 0.284  |
|            |      | FY   | -0.210 | 0.151 | 0.516 | -0.624  | 0.204  |
|            |      | MKT  | -0.136 | 0.146 | 0.790 | -0.536  | 0.265  |
|            | MKT  | Ctrl | 0.019  | 0.141 | 0.999 | -0.368  | 0.406  |
|            |      | FY   | -0.074 | 0.146 | 0.956 | -0.475  | 0.327  |
|            |      | GP   | 0.136  | 0.146 | 0.790 | -0.265  | 0.536  |
| Betaine    | Ctrl | FY   | -1.020 | 4.227 | 0.995 | -12.616 | 10.576 |
|            |      | GP   | -3.042 | 4.227 | 0.888 | -14.638 | 8.554  |
|            |      | MKT  | 5.564  | 4.084 | 0.533 | -5.638  | 16.767 |
|            | FY   | Ctrl | 1.020  | 4.227 | 0.995 | -10.576 | 12.616 |
|            |      | GP   | -2.022 | 4.366 | 0.966 | -13.998 | 9.955  |
|            |      | MKT  | 6.584  | 4.227 | 0.419 | -5.012  | 18.181 |
|            | GP   | Ctrl | 3.042  | 4.227 | 0.888 | -8.554  | 14.638 |
|            |      | FY   | 2.022  | 4.366 | 0.966 | -9.955  | 13.998 |
|            |      | MKT  | 8.606  | 4.227 | 0.201 | -2.990  | 20.202 |
|            | MKT  | Ctrl | -5.564 | 4.084 | 0.533 | -16.767 | 5.638  |
|            |      | FY   | -6.584 | 4.227 | 0.419 | -18.181 | 5.012  |
|            |      | GP   | -8.606 | 4.227 | 0.201 | -20.202 | 2.990  |
| Cadaverine | Ctrl | FY   | 1.043  | 0.613 | 0.343 | -0.638  | 2.723  |
|            |      | GP   | 0.290  | 0.613 | 0.964 | -1.391  | 1.970  |
|            |      | MKT  | -1.088 | 0.592 | 0.279 | -2.712  | 0.535  |
|            | FY   | Ctrl | -1.043 | 0.613 | 0.343 | -2.723  | 0.638  |

|                    |      |      |           |        |       |          |         |
|--------------------|------|------|-----------|--------|-------|----------|---------|
|                    |      | GP   | -0.753    | 0.633  | 0.638 | -2.489   | 0.983   |
|                    |      | MKT  | 07000000* | 0.613  | 0.009 | -3.812   | -0.451  |
|                    | GP   | Ctrl | -0.290    | 0.613  | 0.964 | -1.970   | 1.391   |
|                    |      | FY   | 0.753     | 0.633  | 0.638 | -0.983   | 2.489   |
|                    |      | MKT  | -1.378    | 0.613  | 0.137 | -3.059   | 0.302   |
|                    | MKT  | Ctrl | 1.088     | 0.592  | 0.279 | -0.535   | 2.712   |
|                    |      | FY   | 07000000* | 0.613  | 0.009 | 0.451    | 3.812   |
|                    |      | GP   | 1.378     | 0.613  | 0.137 | -0.302   | 3.059   |
| carnitine          | Ctrl | FY   | -2.901    | 3.098  | 0.786 | -11.398  | 5.597   |
|                    |      | GP   | -5.231    | 3.098  | 0.350 | -13.729  | 3.266   |
|                    |      | MKT  | 2.674     | 2.993  | 0.808 | -5.536   | 10.883  |
|                    | FY   | Ctrl | 2.901     | 3.098  | 0.786 | -5.597   | 11.398  |
|                    |      | GP   | -2.331    | 3.199  | 0.885 | -11.107  | 6.445   |
|                    |      | MKT  | 5.574     | 3.098  | 0.296 | -2.923   | 14.072  |
|                    | GP   | Ctrl | 5.231     | 3.098  | 0.350 | -3.266   | 13.729  |
|                    |      | FY   | 2.331     | 3.199  | 0.885 | -6.445   | 11.107  |
|                    |      | MKT  | 7.905     | 3.098  | 0.075 | -0.592   | 16.403  |
|                    | MKT  | Ctrl | -2.674    | 2.993  | 0.808 | -10.883  | 5.536   |
|                    |      | FY   | -5.574    | 3.098  | 0.296 | -14.072  | 2.923   |
|                    |      | GP   | -7.905    | 3.098  | 0.075 | -16.403  | 0.592   |
| Carnosine          | Ctrl | FY   | -30.073   | 17.039 | 0.312 | -76.817  | 16.670  |
|                    |      | GP   | -25.273   | 17.039 | 0.462 | -72.017  | 21.470  |
|                    |      | MKT  | 19.415    | 16.461 | 0.645 | -25.743  | 64.574  |
|                    | FY   | Ctrl | 30.073    | 17.039 | 0.312 | -16.670  | 76.817  |
|                    |      | GP   | 4.800     | 17.598 | 0.993 | -43.477  | 53.076  |
|                    |      | MKT  | 00000000* | 17.039 | 0.035 | 2.745    | 96.232  |
|                    | GP   | Ctrl | 25.273    | 17.039 | 0.462 | -21.470  | 72.017  |
|                    |      | FY   | -4.800    | 17.598 | 0.993 | -53.076  | 43.477  |
|                    |      | MKT  | 44.689    | 17.039 | 0.065 | -2.055   | 91.432  |
|                    | MKT  | Ctrl | -19.415   | 16.461 | 0.645 | -64.574  | 25.743  |
|                    |      | FY   | 00000000* | 17.039 | 0.035 | -96.232  | -2.745  |
|                    |      | GP   | -44.689   | 17.039 | 0.065 | -91.432  | 2.055   |
| Creatine           | Ctrl | FY   | -11.394   | 38.432 | 0.991 | -116.825 | 94.036  |
|                    |      | GP   | -35.597   | 38.432 | 0.791 | -141.027 | 69.833  |
|                    |      | MKT  | 27.574    | 37.128 | 0.879 | -74.281  | 129.429 |
|                    | FY   | Ctrl | 11.394    | 38.432 | 0.991 | -94.036  | 116.825 |
|                    |      | GP   | -24.203   | 39.692 | 0.928 | -133.091 | 84.685  |
|                    |      | MKT  | 38.969    | 38.432 | 0.743 | -66.462  | 144.399 |
|                    | GP   | Ctrl | 35.597    | 38.432 | 0.791 | -69.833  | 141.027 |
|                    |      | FY   | 24.203    | 39.692 | 0.928 | -84.685  | 133.091 |
|                    |      | MKT  | 63.171    | 38.432 | 0.373 | -42.259  | 168.601 |
|                    | MKT  | Ctrl | -27.574   | 37.128 | 0.879 | -129.429 | 74.281  |
|                    |      | FY   | -38.969   | 38.432 | 0.743 | -144.399 | 66.462  |
|                    |      | GP   | -63.171   | 38.432 | 0.373 | -168.601 | 42.259  |
| Creatine phosphate | Ctrl | FY   | -9.517    | 23.794 | 0.978 | -74.793  | 55.759  |
|                    |      | GP   | 12.328    | 23.794 | 0.954 | -52.947  | 77.604  |

|            |      |      |         |        |       |         |        |
|------------|------|------|---------|--------|-------|---------|--------|
|            |      | MKT  | 8.791   | 22.988 | 0.981 | -54.271 | 71.854 |
|            | FY   | Ctrl | 9.517   | 23.794 | 0.978 | -55.759 | 74.793 |
|            |      | GP   | 21.846  | 24.575 | 0.811 | -45.571 | 89.262 |
|            |      | MKT  | 18.308  | 23.794 | 0.867 | -46.967 | 83.584 |
|            | GP   | Ctrl | -12.328 | 23.794 | 0.954 | -77.604 | 52.947 |
|            |      | FY   | -21.846 | 24.575 | 0.811 | -89.262 | 45.571 |
|            |      | MKT  | -3.537  | 23.794 | 0.999 | -68.813 | 61.739 |
|            | MKT  | Ctrl | -8.791  | 22.988 | 0.981 | -71.854 | 54.271 |
|            |      | FY   | -18.308 | 23.794 | 0.867 | -83.584 | 46.967 |
|            |      | GP   | 3.537   | 23.794 | 0.999 | -61.739 | 68.813 |
| Creatinine | Ctrl | FY   | -1.193  | 3.565  | 0.987 | -10.971 | 8.586  |
|            |      | GP   | 1.276   | 3.565  | 0.984 | -8.503  | 11.054 |
|            |      | MKT  | -0.725  | 3.444  | 0.997 | -10.172 | 8.722  |
|            | FY   | Ctrl | 1.193   | 3.565  | 0.987 | -8.586  | 10.971 |
|            |      | GP   | 2.468   | 3.681  | 0.907 | -7.631  | 12.568 |
|            |      | MKT  | 0.467   | 3.565  | 0.999 | -9.311  | 10.246 |
|            | GP   | Ctrl | -1.276  | 3.565  | 0.984 | -11.054 | 8.503  |
|            |      | FY   | -2.468  | 3.681  | 0.907 | -12.568 | 7.631  |
|            |      | MKT  | -2.001  | 3.565  | 0.943 | -11.780 | 7.778  |
|            | MKT  | Ctrl | 0.725   | 3.444  | 0.997 | -8.722  | 10.172 |
|            |      | FY   | -0.467  | 3.565  | 0.999 | -10.246 | 9.311  |
|            |      | GP   | 2.001   | 3.565  | 0.943 | -7.778  | 11.780 |
| Fumarate   | Ctrl | FY   | 0.092   | 0.101  | 0.803 | -0.187  | 0.370  |
|            |      | GP   | -0.087  | 0.101  | 0.826 | -0.365  | 0.191  |
|            |      | MKT  | 0.028   | 0.098  | 0.992 | -0.241  | 0.297  |
|            | FY   | Ctrl | -0.092  | 0.101  | 0.803 | -0.370  | 0.187  |
|            |      | GP   | -0.179  | 0.105  | 0.341 | -0.466  | 0.109  |
|            |      | MKT  | -0.064  | 0.101  | 0.921 | -0.342  | 0.214  |
|            | GP   | Ctrl | 0.087   | 0.101  | 0.826 | -0.191  | 0.365  |
|            |      | FY   | 0.179   | 0.105  | 0.341 | -0.109  | 0.466  |
|            |      | MKT  | 0.115   | 0.101  | 0.674 | -0.164  | 0.393  |
|            | MKT  | Ctrl | -0.028  | 0.098  | 0.992 | -0.297  | 0.241  |
|            |      | FY   | 0.064   | 0.101  | 0.921 | -0.214  | 0.342  |
|            |      | GP   | -0.115  | 0.101  | 0.674 | -0.393  | 0.164  |
| Glutamate  | Ctrl | FY   | -0.344  | 1.564  | 0.996 | -4.635  | 3.948  |
|            |      | GP   | -1.541  | 1.564  | 0.759 | -5.832  | 2.751  |
|            |      | MKT  | -0.123  | 1.511  | 1.000 | -4.269  | 4.023  |
|            | FY   | Ctrl | 0.344   | 1.564  | 0.996 | -3.948  | 4.635  |
|            |      | GP   | -1.197  | 1.616  | 0.880 | -5.629  | 3.235  |
|            |      | MKT  | 0.220   | 1.564  | 0.999 | -4.071  | 4.512  |
|            | GP   | Ctrl | 1.541   | 1.564  | 0.759 | -2.751  | 5.832  |
|            |      | FY   | 1.197   | 1.616  | 0.880 | -3.235  | 5.629  |
|            |      | MKT  | 1.417   | 1.564  | 0.802 | -2.874  | 5.709  |
|            | MKT  | Ctrl | 0.123   | 1.511  | 1.000 | -4.023  | 4.269  |
|            |      | FY   | -0.220  | 1.564  | 0.999 | -4.512  | 4.071  |
|            |      | GP   | -1.417  | 1.564  | 0.802 | -5.709  | 2.874  |
| Glycine    | Ctrl | FY   | 1.951   | 4.766  | 0.976 | -11.123 | 15.026 |

|                     |      |      |         |       |       |         |        |
|---------------------|------|------|---------|-------|-------|---------|--------|
|                     |      | GP   | 1.220   | 4.766 | 0.994 | -11.854 | 14.295 |
|                     |      | MKT  | 1.689   | 4.604 | 0.983 | -10.942 | 14.320 |
|                     | FY   | Ctrl | -1.951  | 4.766 | 0.976 | -15.026 | 11.123 |
|                     |      | GP   | -0.731  | 4.922 | 0.999 | -14.234 | 12.772 |
|                     |      | MKT  | -0.262  | 4.766 | 1.000 | -13.337 | 12.812 |
|                     | GP   | Ctrl | -1.220  | 4.766 | 0.994 | -14.295 | 11.854 |
|                     |      | FY   | 0.731   | 4.922 | 0.999 | -12.772 | 14.234 |
|                     |      | MKT  | 0.469   | 4.766 | 1.000 | -12.605 | 13.543 |
|                     | MKT  | Ctrl | -1.689  | 4.604 | 0.983 | -14.320 | 10.942 |
|                     |      | FY   | 0.262   | 4.766 | 1.000 | -12.812 | 13.337 |
|                     |      | GP   | -0.469  | 4.766 | 1.000 | -13.543 | 12.605 |
| Glucose             | Ctrl | FY   | 1.860   | 3.073 | 0.929 | -6.571  | 10.292 |
|                     |      | GP   | -1.693  | 3.073 | 0.946 | -10.124 | 6.739  |
|                     |      | MKT  | 1.809   | 2.969 | 0.928 | -6.336  | 9.955  |
|                     | FY   | Ctrl | -1.860  | 3.073 | 0.929 | -10.292 | 6.571  |
|                     |      | GP   | -3.553  | 3.174 | 0.681 | -12.261 | 5.155  |
|                     |      | MKT  | -0.051  | 3.073 | 1.000 | -8.482  | 8.381  |
|                     | GP   | Ctrl | 1.693   | 3.073 | 0.946 | -6.739  | 10.124 |
|                     |      | FY   | 3.553   | 3.174 | 0.681 | -5.155  | 12.261 |
|                     |      | MKT  | 3.502   | 3.073 | 0.669 | -4.929  | 11.934 |
|                     | MKT  | Ctrl | -1.809  | 2.969 | 0.928 | -9.955  | 6.336  |
|                     |      | FY   | 0.051   | 3.073 | 1.000 | -8.381  | 8.482  |
|                     |      | GP   | -3.502  | 3.073 | 0.669 | -11.934 | 4.929  |
| Glucose-6-phosphate | Ctrl | FY   | 4.937   | 5.292 | 0.788 | -9.580  | 19.454 |
|                     |      | GP   | -5.732  | 5.292 | 0.703 | -20.249 | 8.785  |
|                     |      | MKT  | 6.213   | 5.112 | 0.623 | -7.811  | 20.238 |
|                     | FY   | Ctrl | -4.937  | 5.292 | 0.788 | -19.454 | 9.580  |
|                     |      | GP   | -10.669 | 5.465 | 0.232 | -25.662 | 4.324  |
|                     |      | MKT  | 1.277   | 5.292 | 0.995 | -13.240 | 15.794 |
|                     | GP   | Ctrl | 5.732   | 5.292 | 0.703 | -8.785  | 20.249 |
|                     |      | FY   | 10.669  | 5.465 | 0.232 | -4.324  | 25.662 |
|                     |      | MKT  | 11.946  | 5.292 | 0.135 | -2.571  | 26.463 |
|                     | MKT  | Ctrl | -6.213  | 5.112 | 0.623 | -20.238 | 7.811  |
|                     |      | FY   | -1.277  | 5.292 | 0.995 | -15.794 | 13.240 |
|                     |      | GP   | -11.946 | 5.292 | 0.135 | -26.463 | 2.571  |
| Isoleucine          | Ctrl | FY   | 0.037   | 0.188 | 0.997 | -0.478  | 0.551  |
|                     |      | GP   | 0.244   | 0.188 | 0.572 | -0.271  | 0.759  |
|                     |      | MKT  | 0.196   | 0.181 | 0.703 | -0.301  | 0.694  |
|                     | FY   | Ctrl | -0.037  | 0.188 | 0.997 | -0.551  | 0.478  |
|                     |      | GP   | 0.207   | 0.194 | 0.711 | -0.325  | 0.739  |
|                     |      | MKT  | 0.160   | 0.188 | 0.830 | -0.355  | 0.674  |
|                     | GP   | Ctrl | -0.244  | 0.188 | 0.572 | -0.759  | 0.271  |
|                     |      | FY   | -0.207  | 0.194 | 0.711 | -0.739  | 0.325  |
|                     |      | MKT  | -0.048  | 0.188 | 0.994 | -0.563  | 0.467  |
|                     | MKT  | Ctrl | -0.196  | 0.181 | 0.703 | -0.694  | 0.301  |
|                     |      | FY   | -0.160  | 0.188 | 0.830 | -0.674  | 0.355  |
|                     |      | GP   | 0.048   | 0.188 | 0.994 | -0.467  | 0.563  |

|                  |      |      |          |        |       |          |         |
|------------------|------|------|----------|--------|-------|----------|---------|
| Lactate          | Ctrl | FY   | -4.704   | 71.813 | 1.000 | -201.711 | 192.303 |
|                  |      | GP   | -96.682  | 71.813 | 0.543 | -293.689 | 100.325 |
|                  |      | MKT  | 34.455   | 69.378 | 0.959 | -155.872 | 224.782 |
|                  | FY   | Ctrl | 4.704    | 71.813 | 1.000 | -192.303 | 201.711 |
|                  |      | GP   | -91.979  | 74.169 | 0.608 | -295.447 | 111.489 |
|                  |      | MKT  | 39.158   | 71.813 | 0.947 | -157.849 | 236.165 |
|                  | GP   | Ctrl | 96.682   | 71.813 | 0.543 | -100.325 | 293.689 |
|                  |      | FY   | 91.979   | 74.169 | 0.608 | -111.489 | 295.447 |
|                  |      | MKT  | 131.137  | 71.813 | 0.284 | -65.870  | 328.144 |
|                  | MKT  | Ctrl | -34.455  | 69.378 | 0.959 | -224.782 | 155.872 |
|                  |      | FY   | -39.158  | 71.813 | 0.947 | -236.165 | 157.849 |
|                  |      | GP   | -131.137 | 71.813 | 0.284 | -328.144 | 65.870  |
| Leucine          | Ctrl | FY   | 0.040    | 0.293  | 0.999 | -0.764   | 0.845   |
|                  |      | GP   | 0.236    | 0.293  | 0.852 | -0.569   | 1.040   |
|                  |      | MKT  | 0.266    | 0.283  | 0.785 | -0.512   | 1.043   |
|                  | FY   | Ctrl | -0.040   | 0.293  | 0.999 | -0.845   | 0.764   |
|                  |      | GP   | 0.195    | 0.303  | 0.917 | -0.636   | 1.026   |
|                  |      | MKT  | 0.225    | 0.293  | 0.868 | -0.579   | 1.030   |
|                  | GP   | Ctrl | -0.236   | 0.293  | 0.852 | -1.040   | 0.569   |
|                  |      | FY   | -0.195   | 0.303  | 0.917 | -1.026   | 0.636   |
|                  |      | MKT  | 0.030    | 0.293  | 1.000 | -0.774   | 0.835   |
|                  | MKT  | Ctrl | -0.266   | 0.283  | 0.785 | -1.043   | 0.512   |
|                  |      | FY   | -0.225   | 0.293  | 0.868 | -1.030   | 0.579   |
|                  |      | GP   | -0.030   | 0.293  | 1.000 | -0.835   | 0.774   |
| Mannose          | Ctrl | FY   | 1.121    | 0.690  | 0.382 | -0.771   | 3.013   |
|                  |      | GP   | -0.537   | 0.690  | 0.864 | -2.429   | 1.355   |
|                  |      | MKT  | 1.022    | 0.666  | 0.432 | -0.806   | 2.850   |
|                  | FY   | Ctrl | -1.121   | 0.690  | 0.382 | -3.013   | 0.771   |
|                  |      | GP   | -1.658   | 0.712  | 0.118 | -3.612   | 0.296   |
|                  |      | MKT  | -0.099   | 0.690  | 0.999 | -1.991   | 1.793   |
|                  | GP   | Ctrl | 0.537    | 0.690  | 0.864 | -1.355   | 2.429   |
|                  |      | FY   | 1.658    | 0.712  | 0.118 | -0.296   | 3.612   |
|                  |      | MKT  | 1.559    | 0.690  | 0.134 | -0.333   | 3.451   |
|                  | MKT  | Ctrl | -1.022   | 0.666  | 0.432 | -2.850   | 0.806   |
|                  |      | FY   | 0.099    | 0.690  | 0.999 | -1.793   | 1.991   |
|                  |      | GP   | -1.559   | 0.690  | 0.134 | -3.451   | 0.333   |
| myo-<br>inositol | Ctrl | FY   | 0.391    | 0.581  | 0.906 | -1.202   | 1.985   |
|                  |      | GP   | -0.116   | 0.581  | 0.997 | -1.710   | 1.477   |
|                  |      | MKT  | 0.259    | 0.561  | 0.967 | -1.281   | 1.798   |
|                  | FY   | Ctrl | -0.391   | 0.581  | 0.906 | -1.985   | 1.202   |
|                  |      | GP   | -0.508   | 0.600  | 0.832 | -2.154   | 1.138   |
|                  |      | MKT  | -0.133   | 0.581  | 0.996 | -1.726   | 1.461   |
|                  | GP   | Ctrl | 0.116    | 0.581  | 0.997 | -1.477   | 1.710   |
|                  |      | FY   | 0.508    | 0.600  | 0.832 | -1.138   | 2.154   |
|                  |      | MKT  | 0.375    | 0.581  | 0.916 | -1.218   | 1.969   |
|                  | MKT  | Ctrl | -0.259   | 0.561  | 0.967 | -1.798   | 1.281   |
|                  |      | FY   | 0.133    | 0.581  | 0.996 | -1.461   | 1.726   |

|              |      |      |           |          |              |              |        |       |
|--------------|------|------|-----------|----------|--------------|--------------|--------|-------|
| NAD+         | Ctrl | GP   | -0.375    | 0.581    | 0.916        | -1.969       | 1.218  |       |
|              |      | FY   | -0.419    | 0.310    | 0.540        | -1.269       | 0.431  |       |
|              |      | GP   | -0.250    | 0.310    | 0.851        | -1.100       | 0.600  |       |
|              | FY   | MKT  | 0.694     | 0.299    | 0.120        | -0.127       | 1.515  |       |
|              |      | Ctrl | 0.419     | 0.310    | 0.540        | -0.431       | 1.269  |       |
|              |      | GP   | 0.169     | 0.320    | 0.952        | -0.709       | 1.047  |       |
|              | GP   | MKT  | 4200000*  | 0.310    | 0.007        | 0.263        | 1.963  |       |
|              |      | Ctrl | 0.250     | 0.310    | 0.851        | -0.600       | 1.100  |       |
|              |      | FY   | -0.169    | 0.320    | 0.952        | -1.047       | 0.709  |       |
|              | MKT  | MKT  | 23000000* | 0.310    | 0.025        | 0.094        | 1.794  |       |
|              |      | Ctrl | -0.694    | 0.299    | 0.120        | -1.515       | 0.127  |       |
|              |      | FY   | 4200000*  | 0.310    | 0.007        | -1.963       | -0.263 |       |
| NADH         | Ctrl | GP   | 23000000* | 0.310    | 0.025        | -1.794       | -0.094 |       |
|              |      | FY   | 0.178     | 0.235    | 0.873        | -0.467       | 0.822  |       |
|              |      | GP   | 0.306     | 0.235    | 0.569        | -0.339       | 0.951  |       |
|              | FY   | MKT  | 0.207     | 0.227    | 0.800        | -0.416       | 0.829  |       |
|              |      | Ctrl | -0.178    | 0.235    | 0.873        | -0.822       | 0.467  |       |
|              |      | GP   | 0.129     | 0.243    | 0.951        | -0.537       | 0.795  |       |
|              | GP   | MKT  | 0.029     | 0.235    | 0.999        | -0.616       | 0.674  |       |
|              |      | Ctrl | -0.306    | 0.235    | 0.569        | -0.951       | 0.339  |       |
|              |      | FY   | -0.129    | 0.243    | 0.951        | -0.795       | 0.537  |       |
|              | MKT  | MKT  | -0.100    | 0.235    | 0.974        | -0.744       | 0.545  |       |
|              |      | Ctrl | -0.207    | 0.227    | 0.800        | -0.829       | 0.416  |       |
|              |      | FY   | -0.029    | 0.235    | 0.999        | -0.674       | 0.616  |       |
| NADP         | Ctrl | GP   | 0.100     | 0.235    | 0.974        | -0.545       | 0.744  |       |
|              |      | FY   | -0.005    | 0.014    | 0.988        | -0.044       | 0.034  |       |
|              |      | GP   | -0.013    | 0.014    | 0.805        | -0.052       | 0.026  |       |
|              | FY   | MKT  | -0.004    | 0.014    | 0.993        | -0.041       | 0.034  |       |
|              |      | Ctrl | 0.005     | 0.014    | 0.988        | -0.034       | 0.044  |       |
|              |      | GP   | -0.008    | 0.015    | 0.943        | -0.049       | 0.032  |       |
|              | GP   | MKT  | 0.001     | 0.014    | 1.000        | -0.038       | 0.040  |       |
|              |      | Ctrl | 0.013     | 0.014    | 0.805        | -0.026       | 0.052  |       |
|              |      | FY   | 0.008     | 0.015    | 0.943        | -0.032       | 0.049  |       |
|              | MKT  | MKT  | 0.009     | 0.014    | 0.917        | -0.030       | 0.048  |       |
|              |      | Ctrl | 0.004     | 0.014    | 0.993        | -0.034       | 0.041  |       |
|              |      | FY   | -0.001    | 0.014    | 1.000        | -0.040       | 0.038  |       |
| Nicotinurate | Ctrl | GP   | -0.009    | 0.014    | 0.917        | -0.048       | 0.030  |       |
|              |      | FY   | -0.372    | 0.203    | 0.282        | -0.929       | 0.185  |       |
|              |      | GP   | 3400000*  | 0.203    | <b>0.014</b> | -1.230       | -0.116 |       |
|              | FY   | MKT  | 0.016     | 0.196    | 1.000        | -0.523       | 0.554  |       |
|              |      | Ctrl | 0.372     | 0.203    | 0.282        | -0.185       | 0.929  |       |
|              |      | GP   | -0.301    | 0.210    | 0.489        | -0.877       | 0.274  |       |
|              | GP   | MKT  | 0.388     | 0.203    | 0.249        | -0.170       | 0.945  |       |
|              |      | Ctrl | 3400000*  | 0.203    | <b>0.014</b> | 0.116        | 1.230  |       |
|              |      | FY   | 0.301     | 0.210    | 0.489        | -0.274       | 0.877  |       |
|              |      |      | MKT       | 3100000* | 0.203        | <b>0.011</b> | 0.132  | 1.246 |



|                   |      |        |           |       |              |        |        |
|-------------------|------|--------|-----------|-------|--------------|--------|--------|
|                   | MKT  | Ctrl   | -0.016    | 0.196 | 1.000        | -0.554 | 0.523  |
|                   |      | FY     | -0.388    | 0.203 | 0.249        | -0.945 | 0.170  |
|                   |      | GP     | 31000000* | 0.203 | <b>0.011</b> | -1.246 | -0.132 |
| O-Acetylcarnitine | Ctrl | FY     | 0.208     | 1.183 | 0.998        | -3.037 | 3.453  |
|                   |      | GP     | 0.937     | 1.183 | 0.857        | -2.308 | 4.182  |
|                   |      | MKT    | 1.626     | 1.143 | 0.497        | -1.509 | 4.760  |
|                   | FY   | Ctrl   | -0.208    | 1.183 | 0.998        | -3.453 | 3.037  |
|                   |      | GP     | 0.729     | 1.222 | 0.932        | -2.622 | 4.080  |
|                   |      | MKT    | 1.418     | 1.183 | 0.633        | -1.827 | 4.662  |
|                   | GP   | Ctrl   | -0.937    | 1.183 | 0.857        | -4.182 | 2.308  |
|                   |      | FY     | -0.729    | 1.222 | 0.932        | -4.080 | 2.622  |
|                   |      | MKT    | 0.688     | 1.183 | 0.937        | -2.556 | 3.933  |
| MKT               | Ctrl | -1.626 | 1.143     | 0.497 | -4.760       | 1.509  |        |
|                   | FY   | -1.418 | 1.183     | 0.633 | -4.662       | 1.827  |        |
|                   | GP   | -0.688 | 1.183     | 0.937 | -3.933       | 2.556  |        |
| Phenylalanine     | Ctrl | FY     | -0.103    | 0.072 | 0.496        | -0.302 | 0.096  |
|                   |      | GP     | 0.058     | 0.072 | 0.856        | -0.141 | 0.256  |
|                   |      | MKT    | 0.082     | 0.070 | 0.649        | -0.110 | 0.274  |
|                   | FY   | Ctrl   | 0.103     | 0.072 | 0.496        | -0.096 | 0.302  |
|                   |      | GP     | 0.161     | 0.075 | 0.164        | -0.044 | 0.366  |
|                   |      | MKT    | 0.185     | 0.072 | 0.074        | -0.013 | 0.384  |
|                   | GP   | Ctrl   | -0.058    | 0.072 | 0.856        | -0.256 | 0.141  |
|                   |      | FY     | -0.161    | 0.075 | 0.164        | -0.366 | 0.044  |
|                   |      | MKT    | 0.024     | 0.072 | 0.986        | -0.174 | 0.223  |
| MKT               | Ctrl | -0.082 | 0.070     | 0.649 | -0.274       | 0.110  |        |
|                   | FY   | -0.185 | 0.072     | 0.074 | -0.384       | 0.013  |        |
|                   | GP   | -0.024 | 0.072     | 0.986 | -0.223       | 0.174  |        |
| Pyruvate          | Ctrl | FY     | 0.149     | 0.217 | 0.900        | -0.446 | 0.744  |
|                   |      | GP     | -0.201    | 0.217 | 0.792        | -0.795 | 0.394  |
|                   |      | MKT    | 0.192     | 0.209 | 0.797        | -0.383 | 0.766  |
|                   | FY   | Ctrl   | -0.149    | 0.217 | 0.900        | -0.744 | 0.446  |
|                   |      | GP     | -0.350    | 0.224 | 0.417        | -0.964 | 0.264  |
|                   |      | MKT    | 0.042     | 0.217 | 0.997        | -0.552 | 0.637  |
|                   | GP   | Ctrl   | 0.201     | 0.217 | 0.792        | -0.394 | 0.795  |
|                   |      | FY     | 0.350     | 0.224 | 0.417        | -0.264 | 0.964  |
|                   |      | MKT    | 0.392     | 0.217 | 0.292        | -0.203 | 0.987  |
| MKT               | Ctrl | -0.192 | 0.209     | 0.797 | -0.766       | 0.383  |        |
|                   | FY   | -0.042 | 0.217     | 0.997 | -0.637       | 0.552  |        |
|                   | GP   | -0.392 | 0.217     | 0.292 | -0.987       | 0.203  |        |
| Taurine           | Ctrl | FY     | -3.166    | 2.325 | 0.534        | -9.543 | 3.212  |
|                   |      | GP     | -2.077    | 2.325 | 0.808        | -8.454 | 4.301  |
|                   |      | MKT    | 1.289     | 2.246 | 0.939        | -4.873 | 7.450  |
|                   | FY   | Ctrl   | 3.166     | 2.325 | 0.534        | -3.212 | 9.543  |
|                   |      | GP     | 1.089     | 2.401 | 0.968        | -5.498 | 7.675  |
|                   |      | MKT    | 4.454     | 2.325 | 0.246        | -1.923 | 10.832 |
| GP                | Ctrl | 2.077  | 2.325     | 0.808 | -4.301       | 8.454  |        |

|            |      |      |        |       |       |         |       |
|------------|------|------|--------|-------|-------|---------|-------|
|            |      | FY   | -1.089 | 2.401 | 0.968 | -7.675  | 5.498 |
|            |      | MKT  | 3.365  | 2.325 | 0.482 | -3.012  | 9.743 |
|            | MKT  | Ctrl | -1.289 | 2.246 | 0.939 | -7.450  | 4.873 |
|            |      | FY   | -4.454 | 2.325 | 0.246 | -10.832 | 1.923 |
|            |      | GP   | -3.365 | 2.325 | 0.482 | -9.743  | 3.012 |
| Tyrosine   | Ctrl | FY   | -0.171 | 0.111 | 0.435 | -0.476  | 0.135 |
|            |      | GP   | 0.083  | 0.111 | 0.879 | -0.223  | 0.389 |
|            |      | MKT  | 0.072  | 0.108 | 0.908 | -0.223  | 0.368 |
|            | FY   | Ctrl | 0.171  | 0.111 | 0.435 | -0.135  | 0.476 |
|            |      | GP   | 0.253  | 0.115 | 0.150 | -0.063  | 0.569 |
|            |      | MKT  | 0.243  | 0.111 | 0.157 | -0.063  | 0.548 |
|            | GP   | Ctrl | -0.083 | 0.111 | 0.879 | -0.389  | 0.223 |
|            |      | FY   | -0.253 | 0.115 | 0.150 | -0.569  | 0.063 |
|            |      | MKT  | -0.011 | 0.111 | 1.000 | -0.317  | 0.295 |
|            | MKT  | Ctrl | -0.072 | 0.108 | 0.908 | -0.368  | 0.223 |
|            |      | FY   | -0.243 | 0.111 | 0.157 | -0.548  | 0.063 |
|            |      | GP   | 0.011  | 0.111 | 1.000 | -0.295  | 0.317 |
| Tryptophan | Ctrl | FY   | 0.024  | 0.025 | 0.769 | -0.044  | 0.091 |
|            |      | GP   | -0.002 | 0.025 | 1.000 | -0.070  | 0.065 |
|            |      | MKT  | 0.005  | 0.024 | 0.997 | -0.061  | 0.070 |
|            | FY   | Ctrl | -0.024 | 0.025 | 0.769 | -0.091  | 0.044 |
|            |      | GP   | -0.026 | 0.025 | 0.732 | -0.096  | 0.044 |
|            |      | MKT  | -0.019 | 0.025 | 0.863 | -0.087  | 0.048 |
|            | GP   | Ctrl | 0.002  | 0.025 | 1.000 | -0.065  | 0.070 |
|            |      | FY   | 0.026  | 0.025 | 0.732 | -0.044  | 0.096 |
|            |      | MKT  | 0.007  | 0.025 | 0.991 | -0.060  | 0.075 |
|            | MKT  | Ctrl | -0.005 | 0.024 | 0.997 | -0.070  | 0.061 |
|            |      | FY   | 0.019  | 0.025 | 0.863 | -0.048  | 0.087 |
|            |      | GP   | -0.007 | 0.025 | 0.991 | -0.075  | 0.060 |
| Valine     | Ctrl | FY   | 0.202  | 0.356 | 0.941 | -0.775  | 1.179 |
|            |      | GP   | 0.391  | 0.356 | 0.695 | -0.587  | 1.368 |
|            |      | MKT  | 0.526  | 0.344 | 0.436 | -0.418  | 1.470 |
|            | FY   | Ctrl | -0.202 | 0.356 | 0.941 | -1.179  | 0.775 |
|            |      | GP   | 0.189  | 0.368 | 0.955 | -0.820  | 1.198 |
|            |      | MKT  | 0.324  | 0.356 | 0.800 | -0.653  | 1.301 |
|            | GP   | Ctrl | -0.391 | 0.356 | 0.695 | -1.368  | 0.587 |
|            |      | FY   | -0.189 | 0.368 | 0.955 | -1.198  | 0.820 |
|            |      | MKT  | 0.135  | 0.356 | 0.981 | -0.842  | 1.112 |
|            | MKT  | Ctrl | -0.526 | 0.344 | 0.436 | -1.470  | 0.418 |
|            |      | FY   | -0.324 | 0.356 | 0.800 | -1.301  | 0.653 |
|            |      | GP   | -0.135 | 0.356 | 0.981 | -1.112  | 0.842 |

Data from dairy calves fed with control milk replacer (Ctrl, n=8); milk replacer supplemented with glycine and proline (GP, n=7); milk replacer supplemented with phenylalanine and tyrosine (FY, n=7) and milk replacer supplemented with lysine, methionine and threonine (MKT, n=8).

\*: The mean difference is significant at the 0.05 level.
